# Supplementary material
Source: PubMed Central journal article supplement (PMC4784093)
Supplement: NIHMS760609-supplement-supplemental_material.pdf [file NIHMS760609-supplement-supplemental_material.pdf]

**UPLC-MS-ELSD-PDA as A Powerful Dereplication Tool to Facilitate Compound Identification from Small Molecule Natural Product Libraries**

Table of Contents:

**Figure S1:** UPLC-MS-ELSD-PDA analysis of a mixture of authentic samples homoeriodictyol (**1**), hesperetin (**2**) and sterubin (**3**) with a different UPLC condition.

**Figure S2:** UPLC-MS-ELSD-PDA analysis of hit 78821-c4 containing homoeriodictyol (**1**), hesperetin (**2**) and sterubin (**3**) with a different UPLC condition.

**Figures S3-S4:** NMR spectra of the mixture of acetylated compounds **5a** and **5b**.

**Figures S5-S9:** NMR spectra of compound **9**.

**Figures S10-S13:** NMR spectra of compound **10**.

**Figure S14:** UPLC-MS data showing deoxypodorhizone as the major compound in 79684-c9 from the stem of *Thuja occidentalis*.

**Figure S15:** 400 MHz <sup>1</sup>H NMR spectrum of 79864-c9 indicating the presence of deoxypodorhizone.

**Figure S16:** HRESIMS Spectrum of Compound **9**.

**Figure S17:** HRESIMS Spectrum of Compound **10**.

**Table S1-S4:** X-Ray data of compound **9**.

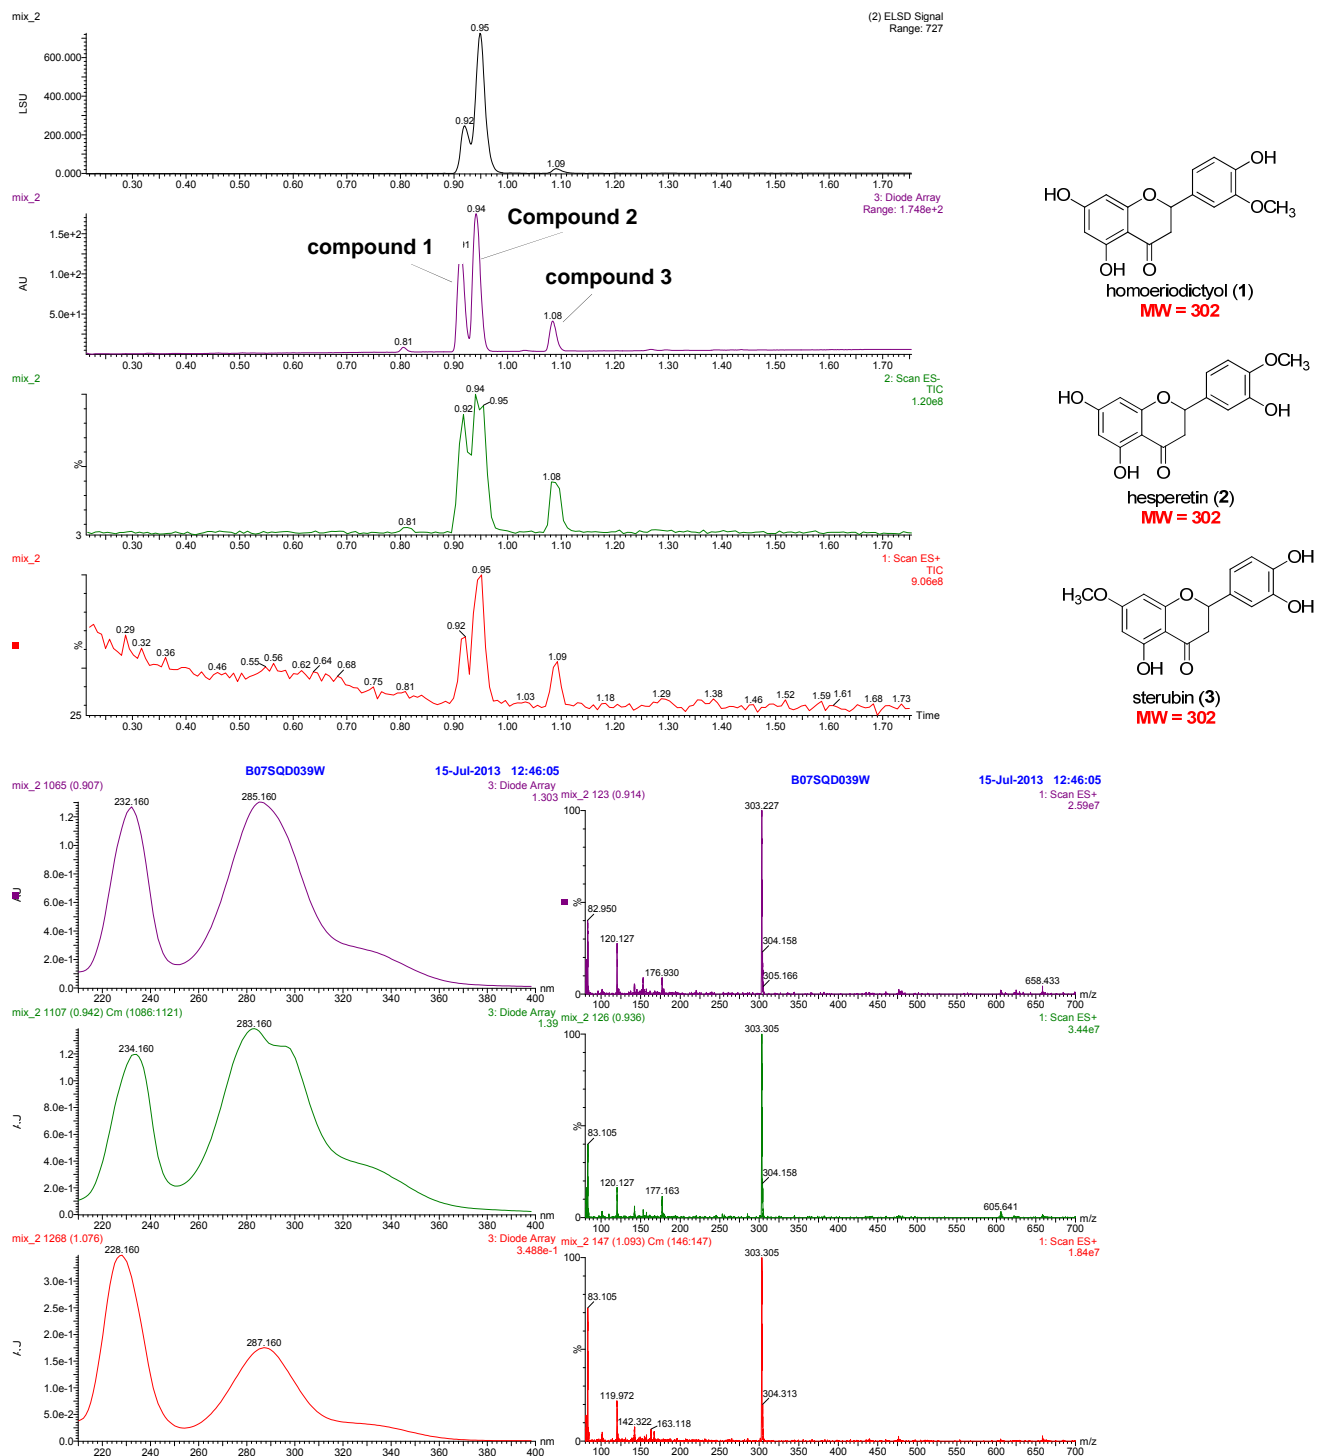

**Figure S1.** UPLC-MS-ELSD-PDA analysis of a mixture of authentic samples homoeriodictyol (1), hesperetin (2) and sterubin (3). Compounds 1 and 2 were from the commercial source Indofine and compound 3 was from our NCNPR repository.

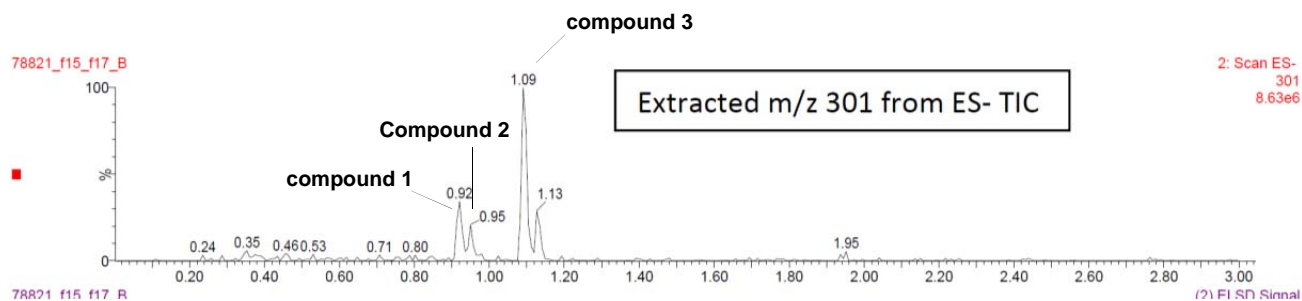

**Figure S2.** UPLC-MS-ELSD-PDA analysis of hit 78821-c4 containing homoeriodictyol (**1**), hesperetin (**2**) and sterubin (**3**).

**MS Conditions:**

Waters SQD MS with ESI source  
 Operated in Positive/Negative mode with switching every 0.02 sec.  
 Capillary Voltage: 4.0 KV  
 Extractor Voltage: 44.0 V  
 RF lens Voltage: 0.10 V  
 Source Temperature: 150° C  
 Desolvation Temperature: 250° C  
 Desolvation Gas Flow (nitrogen): 500 L/Hr  
 Cone Gas Flow (nitrogen): 30 L/Hr

**UPLC Conditions:**

Waters Acquity UPLC Classic  
 Column: Waters BEH C18 - 1.7 um, 5 x 2.1 mm  
 Column Temp: 50° C  
 Mobile Phase A: Water/0.1% formic acid  
 Mobile Phase B: Acetonitrile/0.1% formic acid

**Gradient:**

| <u>Time-min.</u> | <u>Flow-ml/min</u> | <u>%A</u> | <u>%B</u> |
|------------------|--------------------|-----------|-----------|
| 1                | 1.0                | 85        | 15        |
| 0.20             | 1.0                | 80        | 20        |
| 2.85             | 1.0                | 5         | 95        |
| 2.95             | 1.0                | 5         | 95        |
| 3.0              | 1.0                | 85        | 20        |

**Data Acquisition: MassLynx Software**

Figure S3. 400 MHz <sup>1</sup>H NMR spectrum of acetylated mixture of compounds **5a** and **5b** in CDCl<sub>3</sub>.

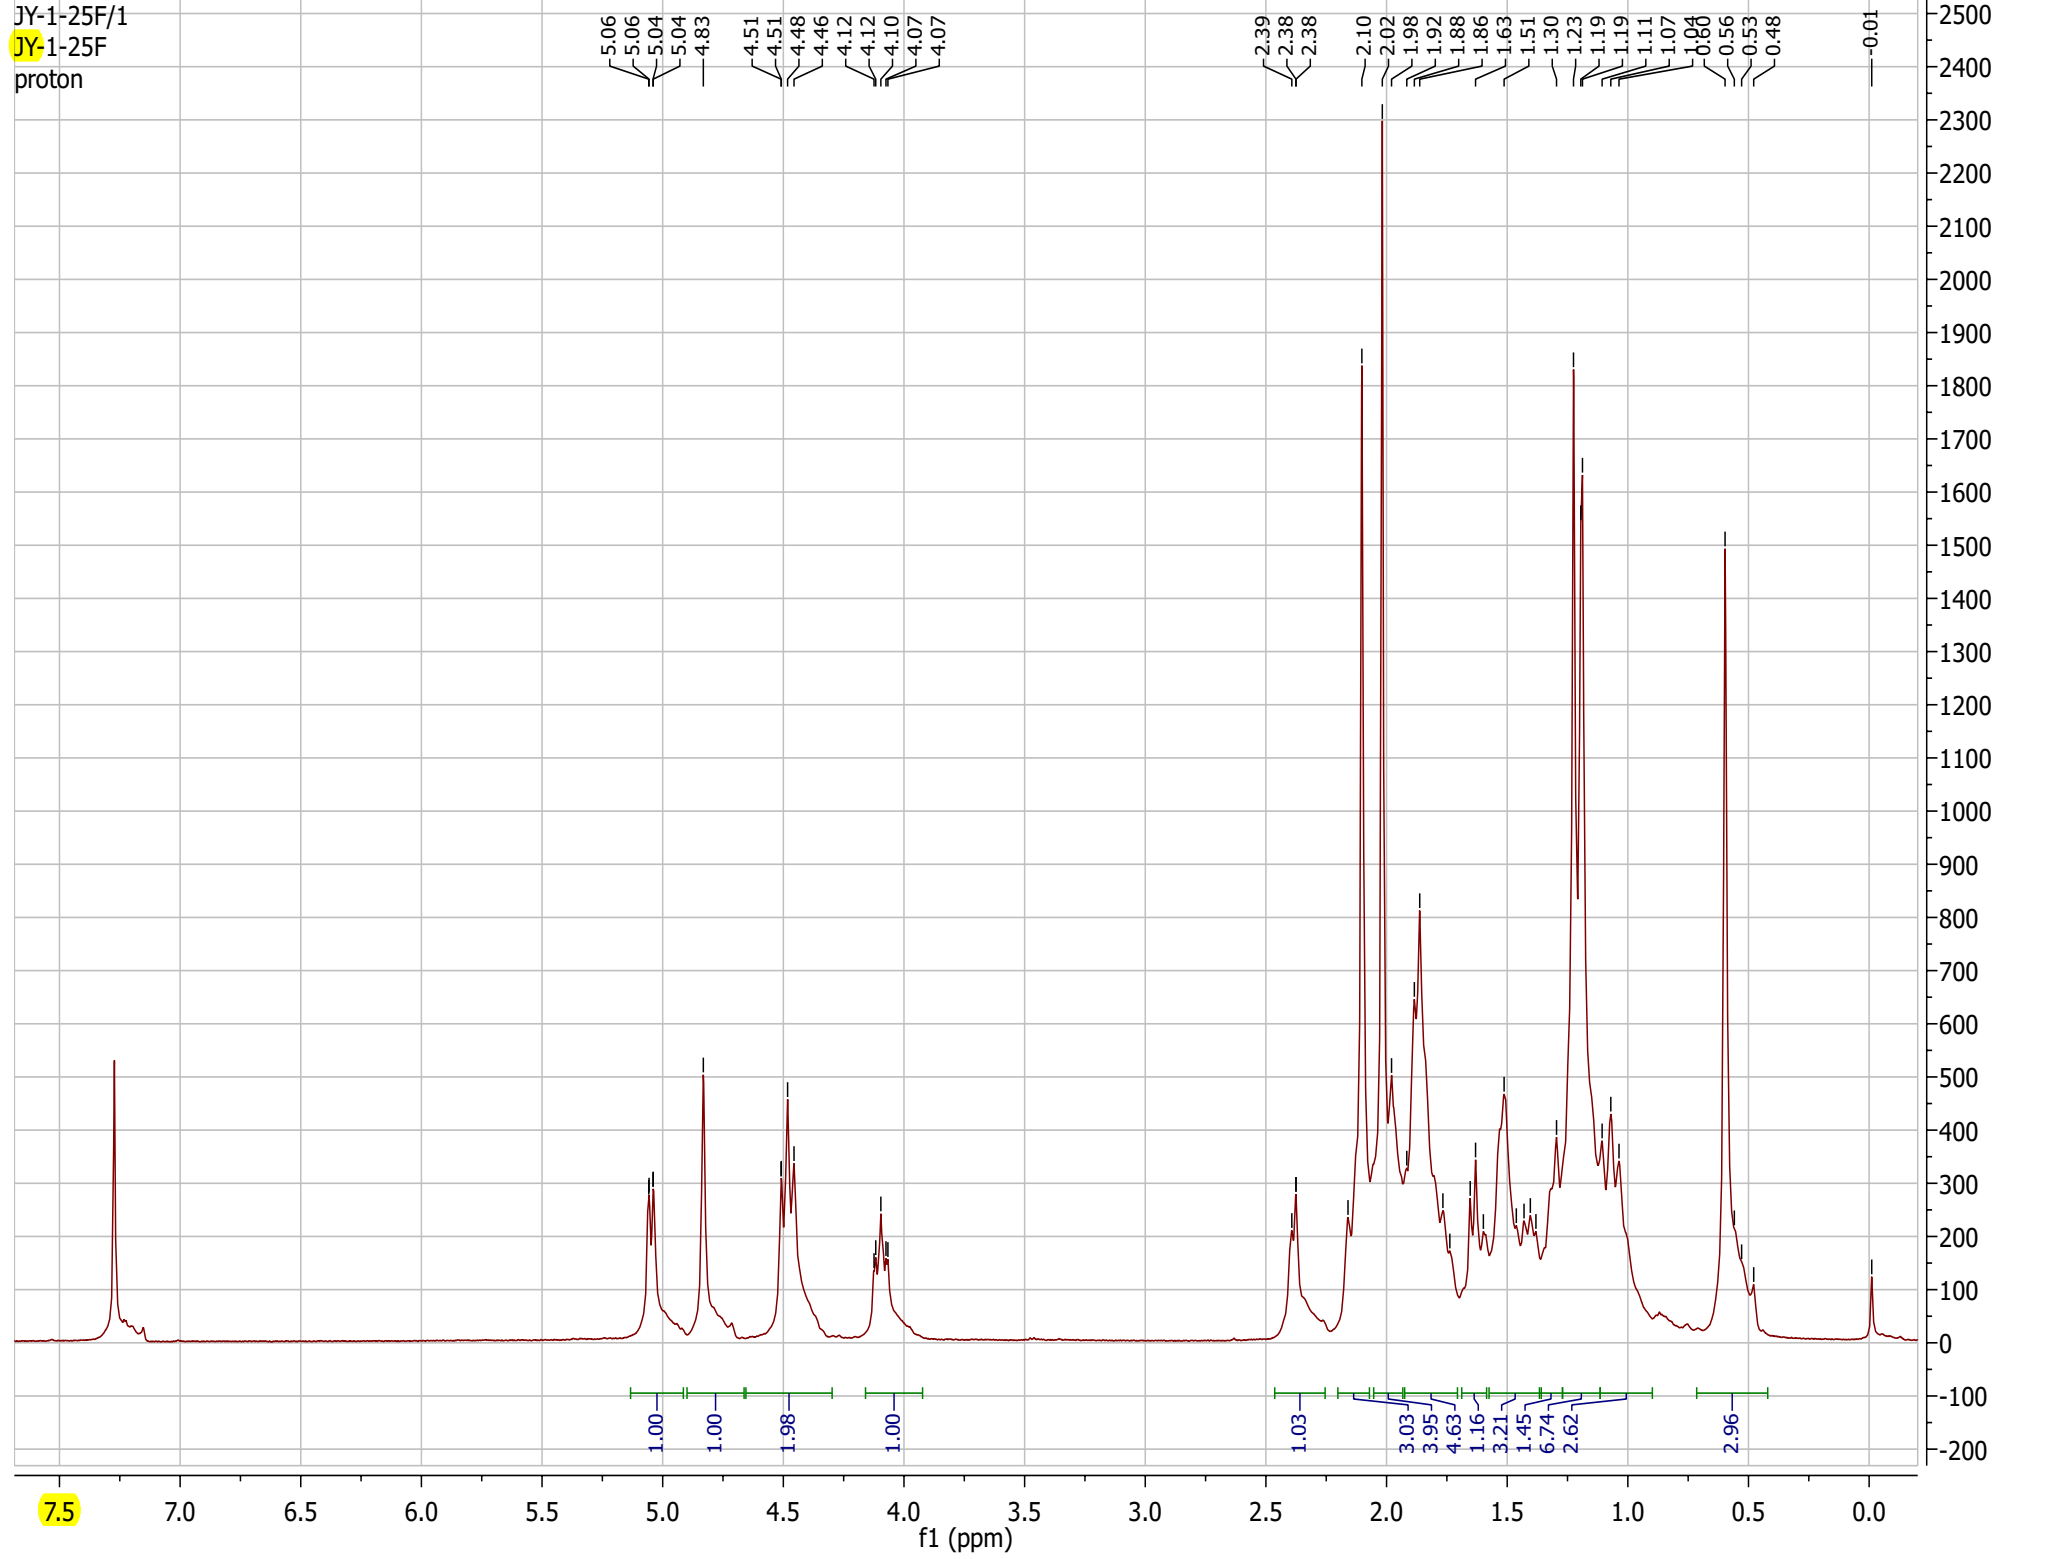

**Figure S4.** 100 MHz  $^{13}\text{C}$  NMR spectrum of acetylated mixture of compounds **5a** and **5b** in  $\text{CDCl}_3$ .

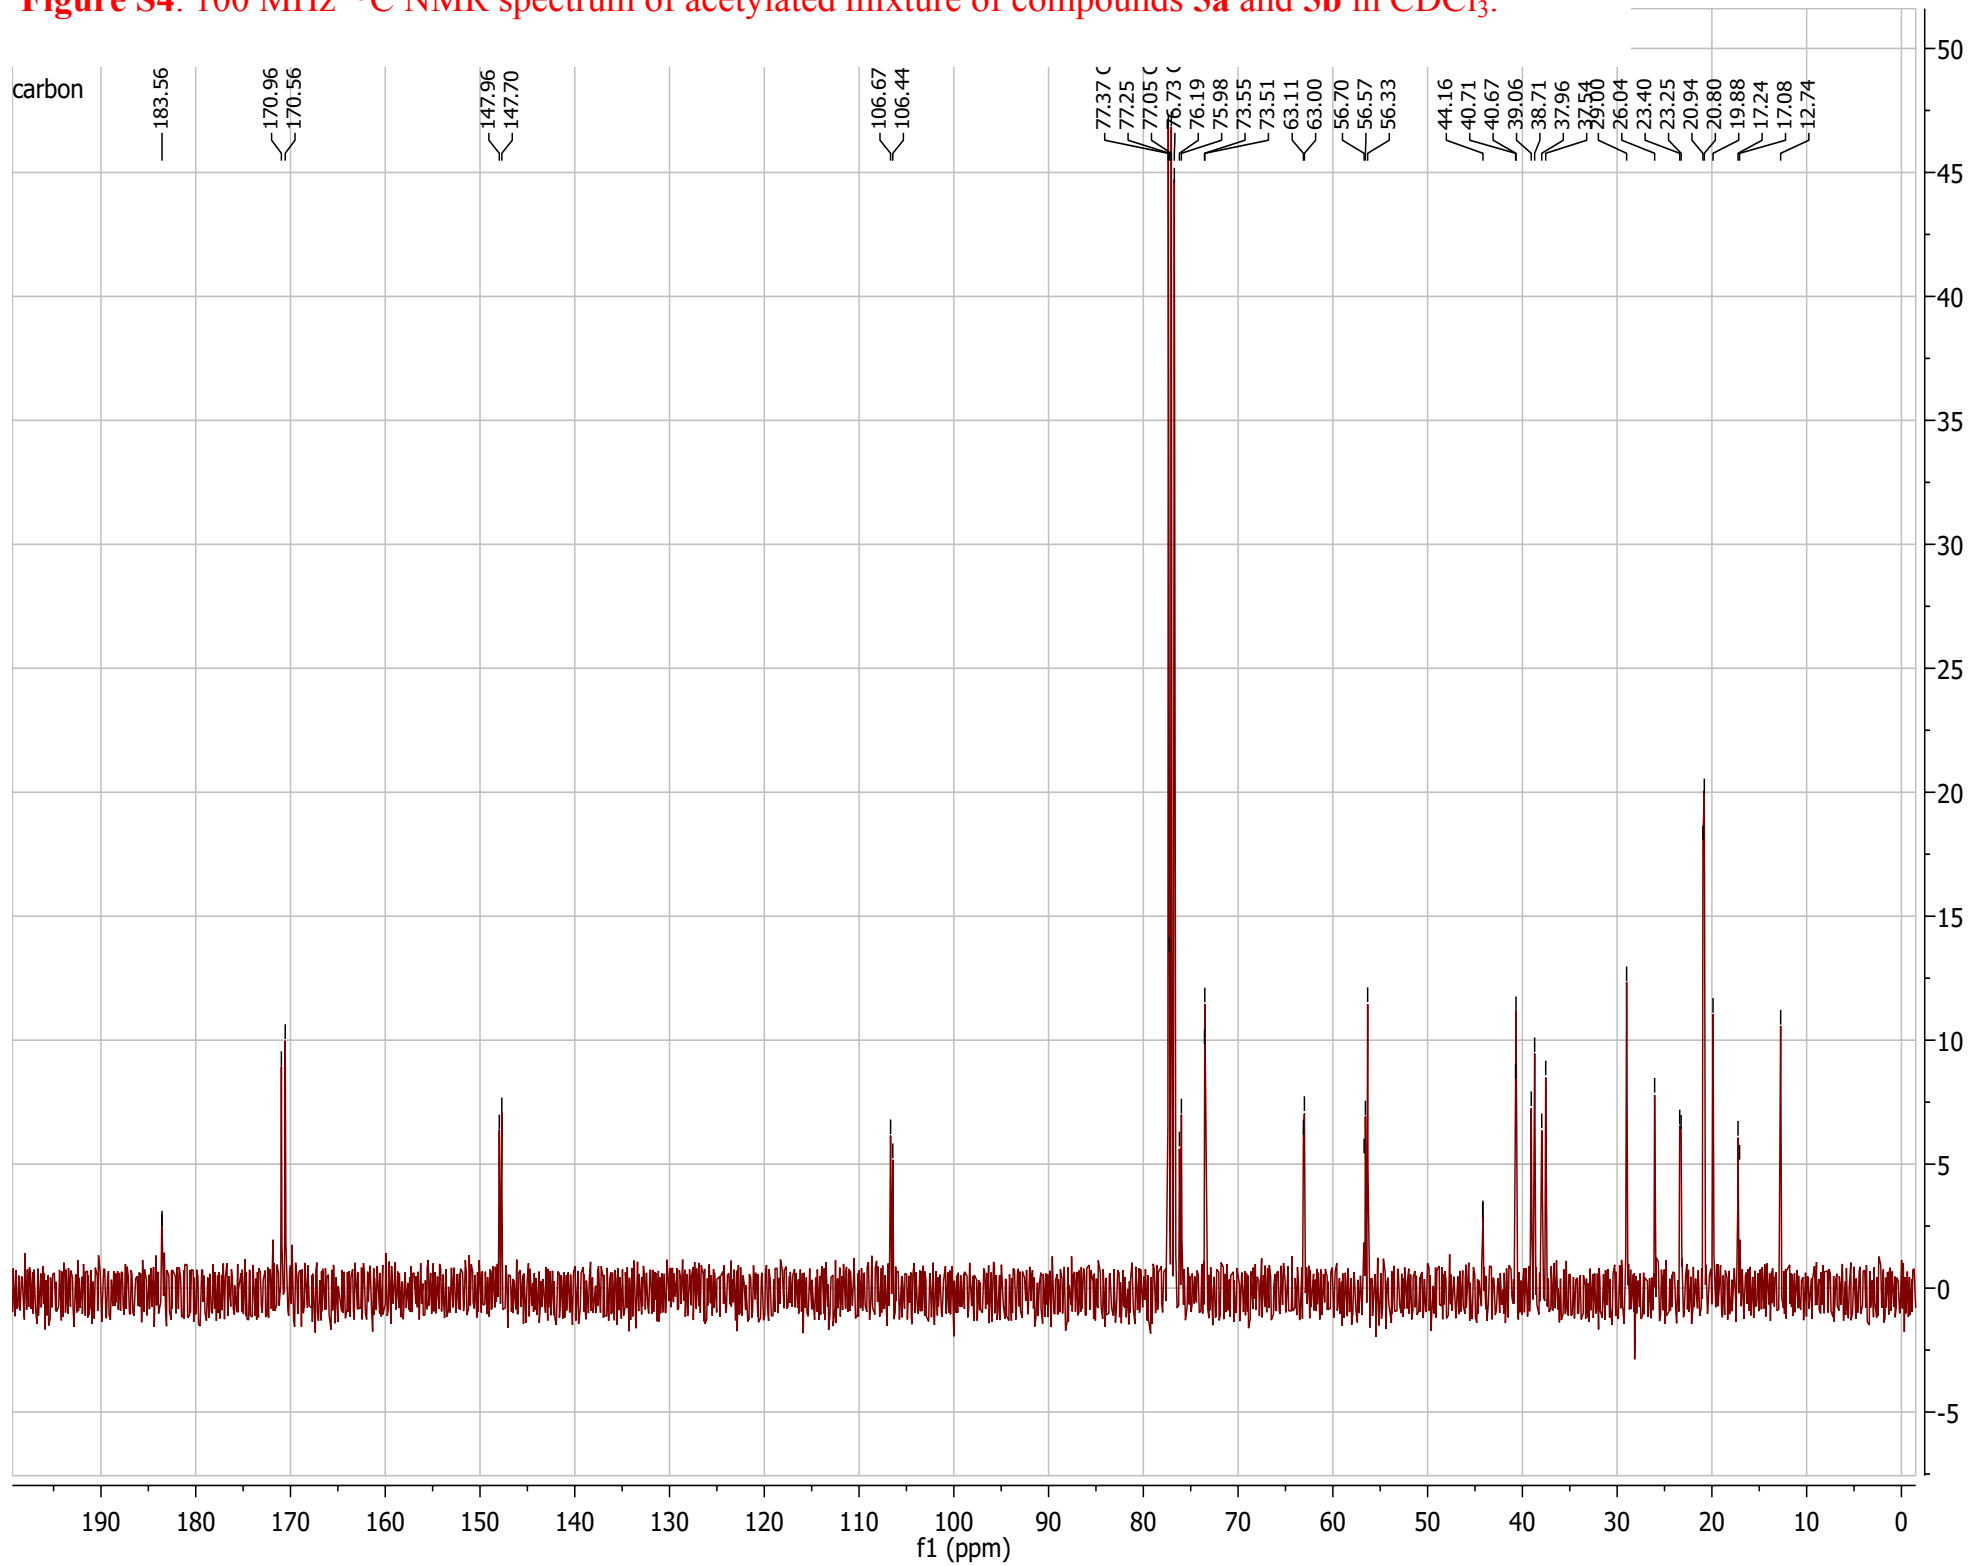

Figure S5. 400 MHz  $^1\text{H}$  NMR spectrum of compound **9** in  $\text{CDCl}_3$ .

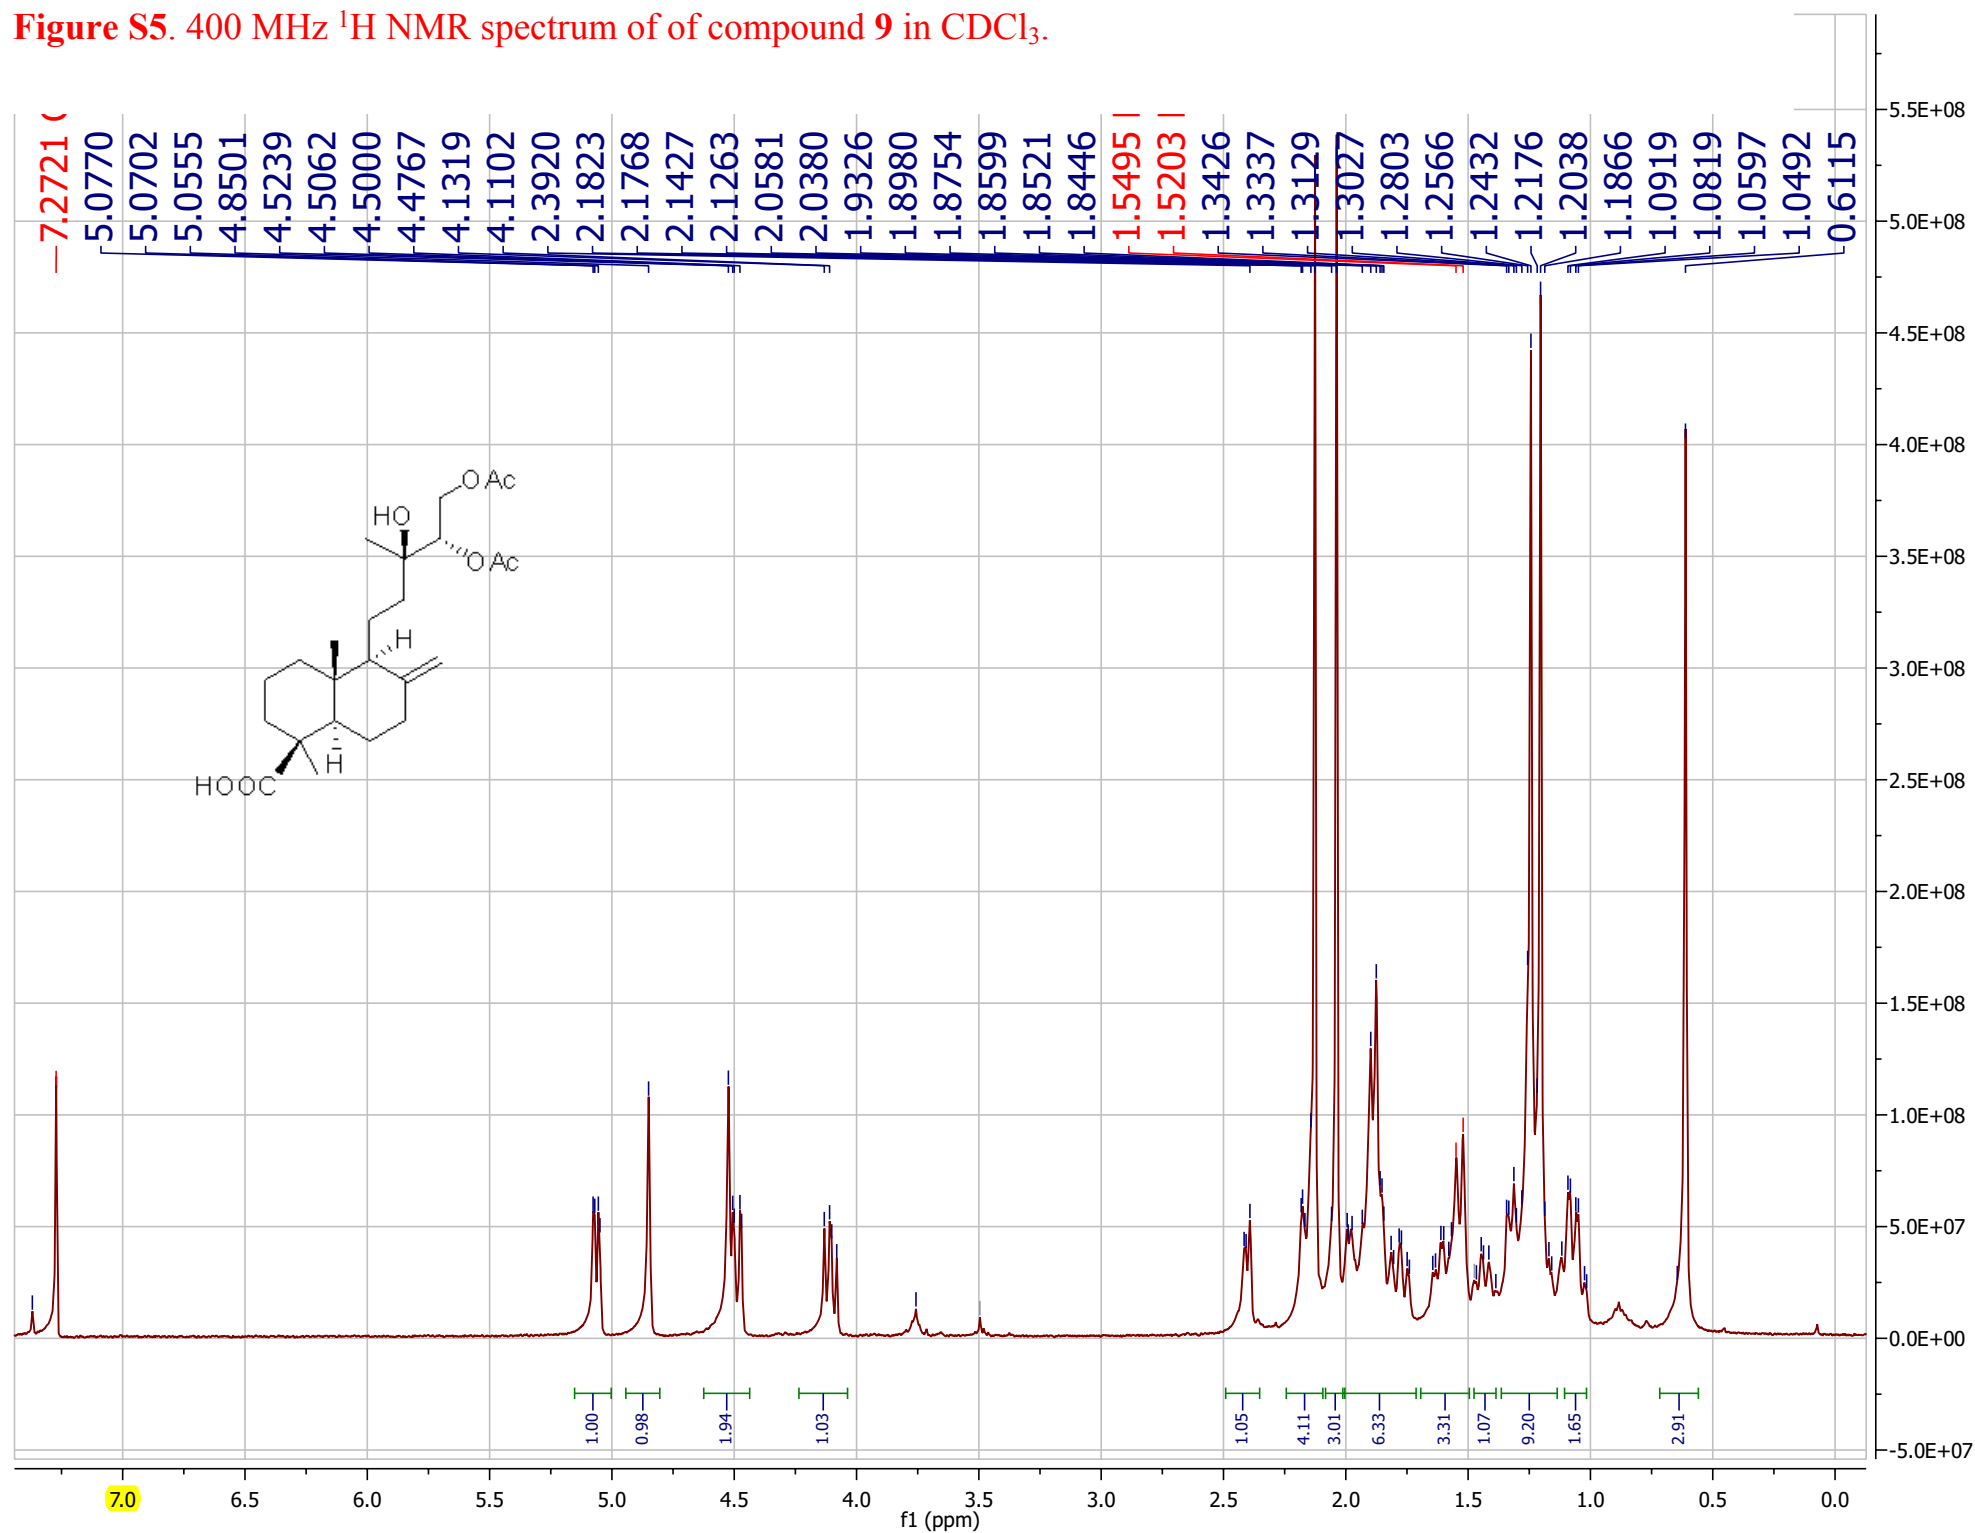

**Figure S6.** 100 MHz  $^{13}\text{C}$  NMR spectrum of of compound **9** in  $\text{CDCl}_3$ .

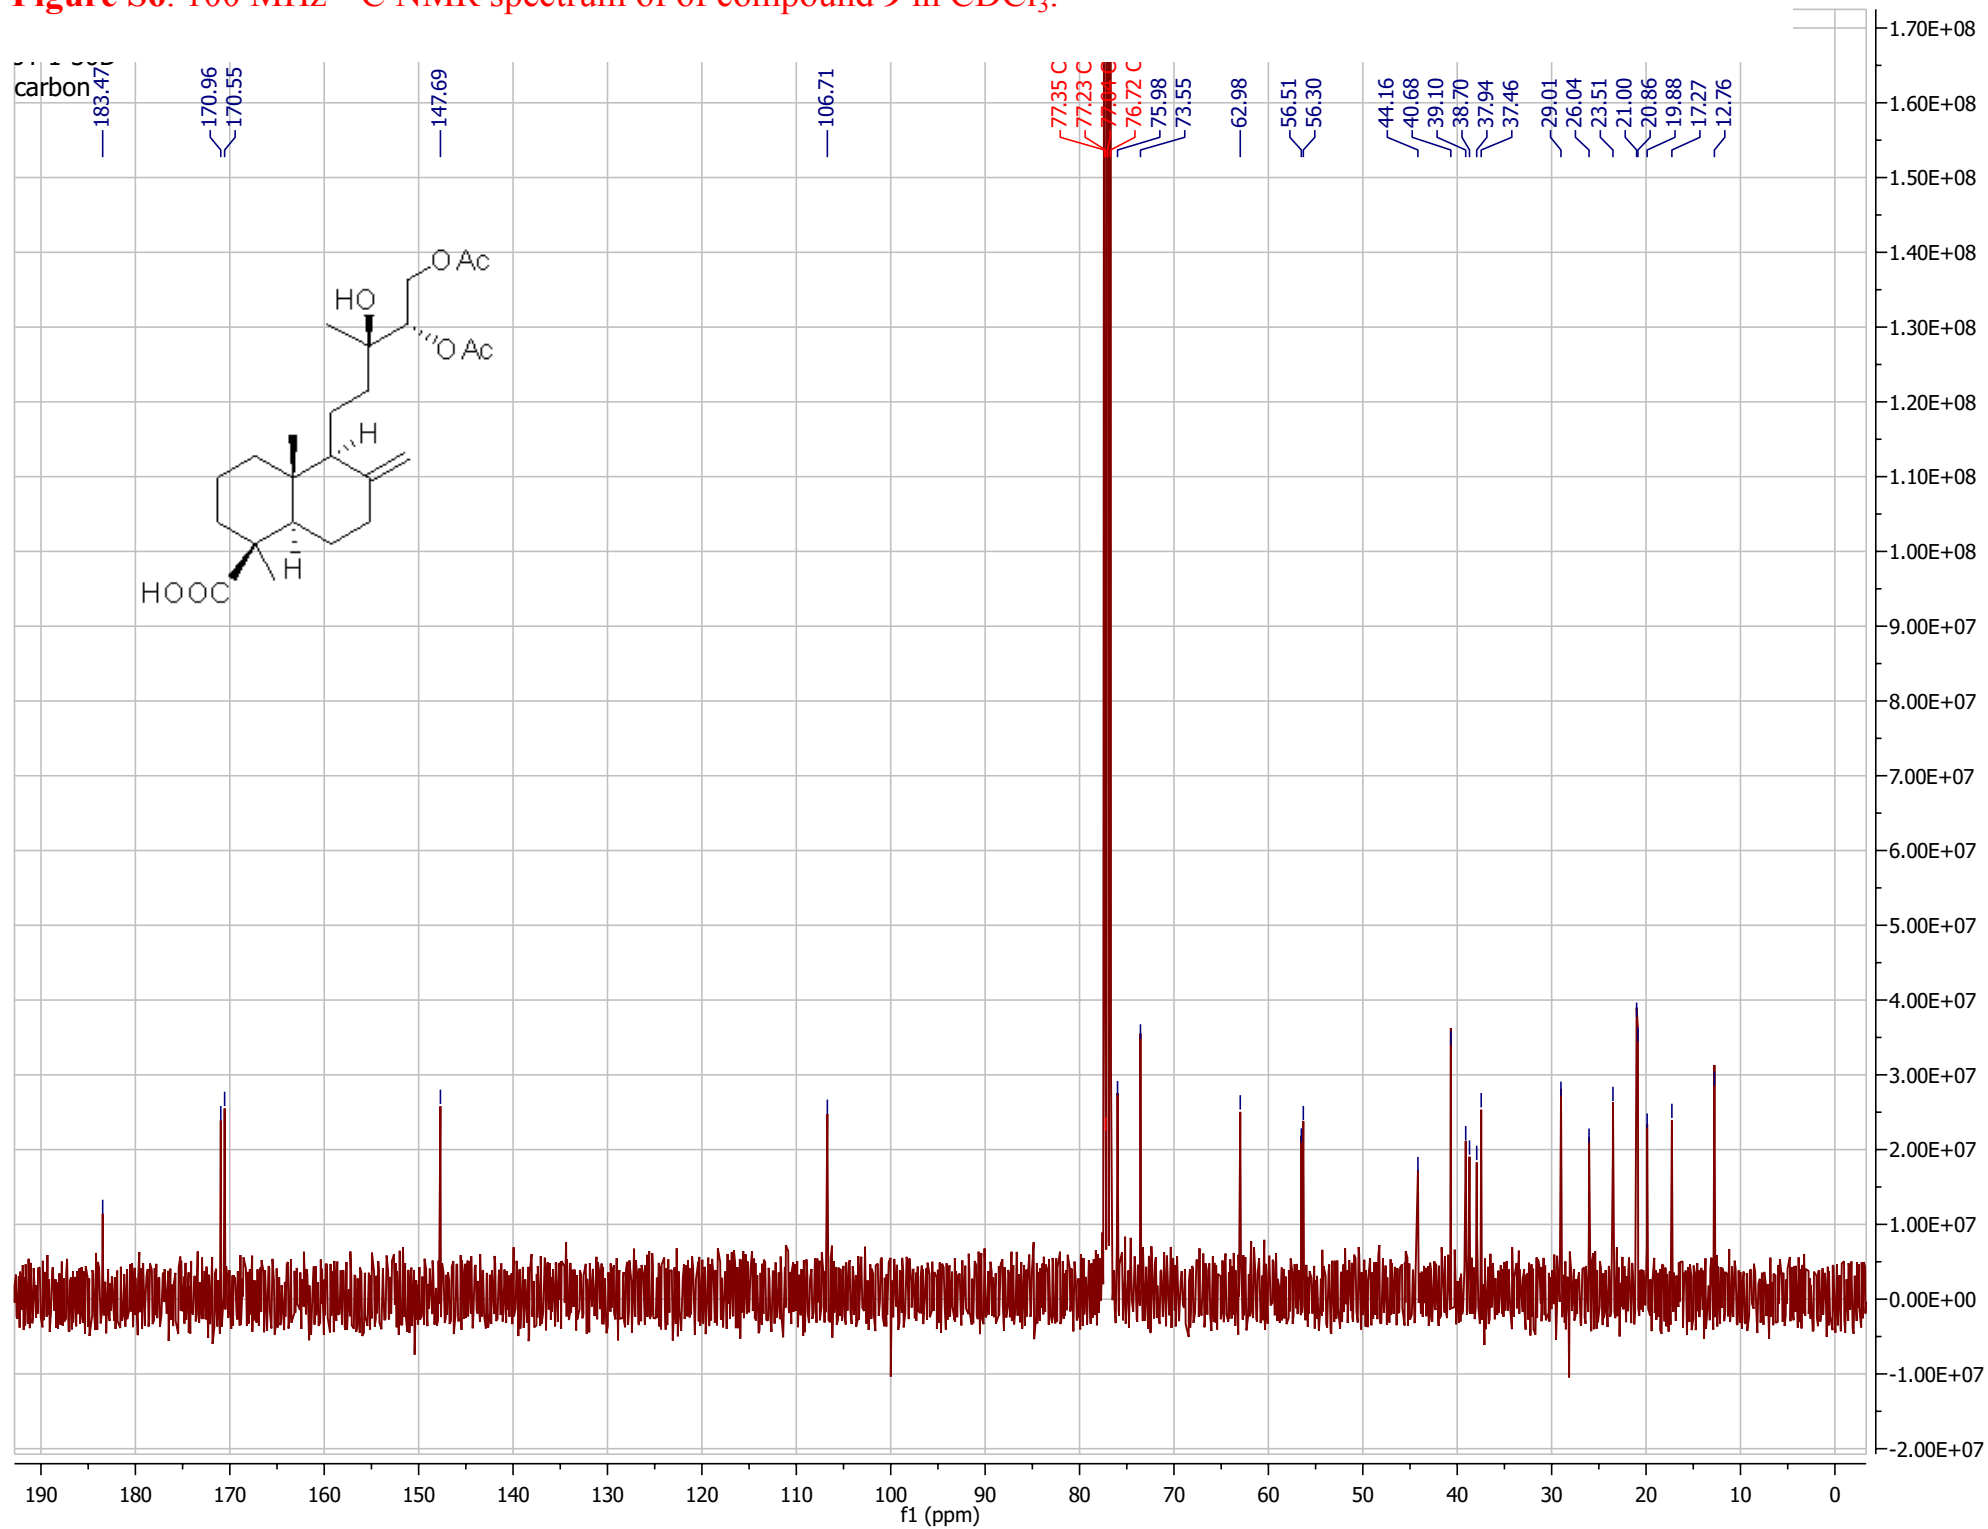

**Figure S7.** 400 MHz HMQC spectrum of of compound **9** in CDCl<sub>3</sub>.

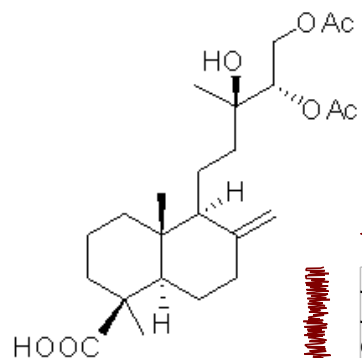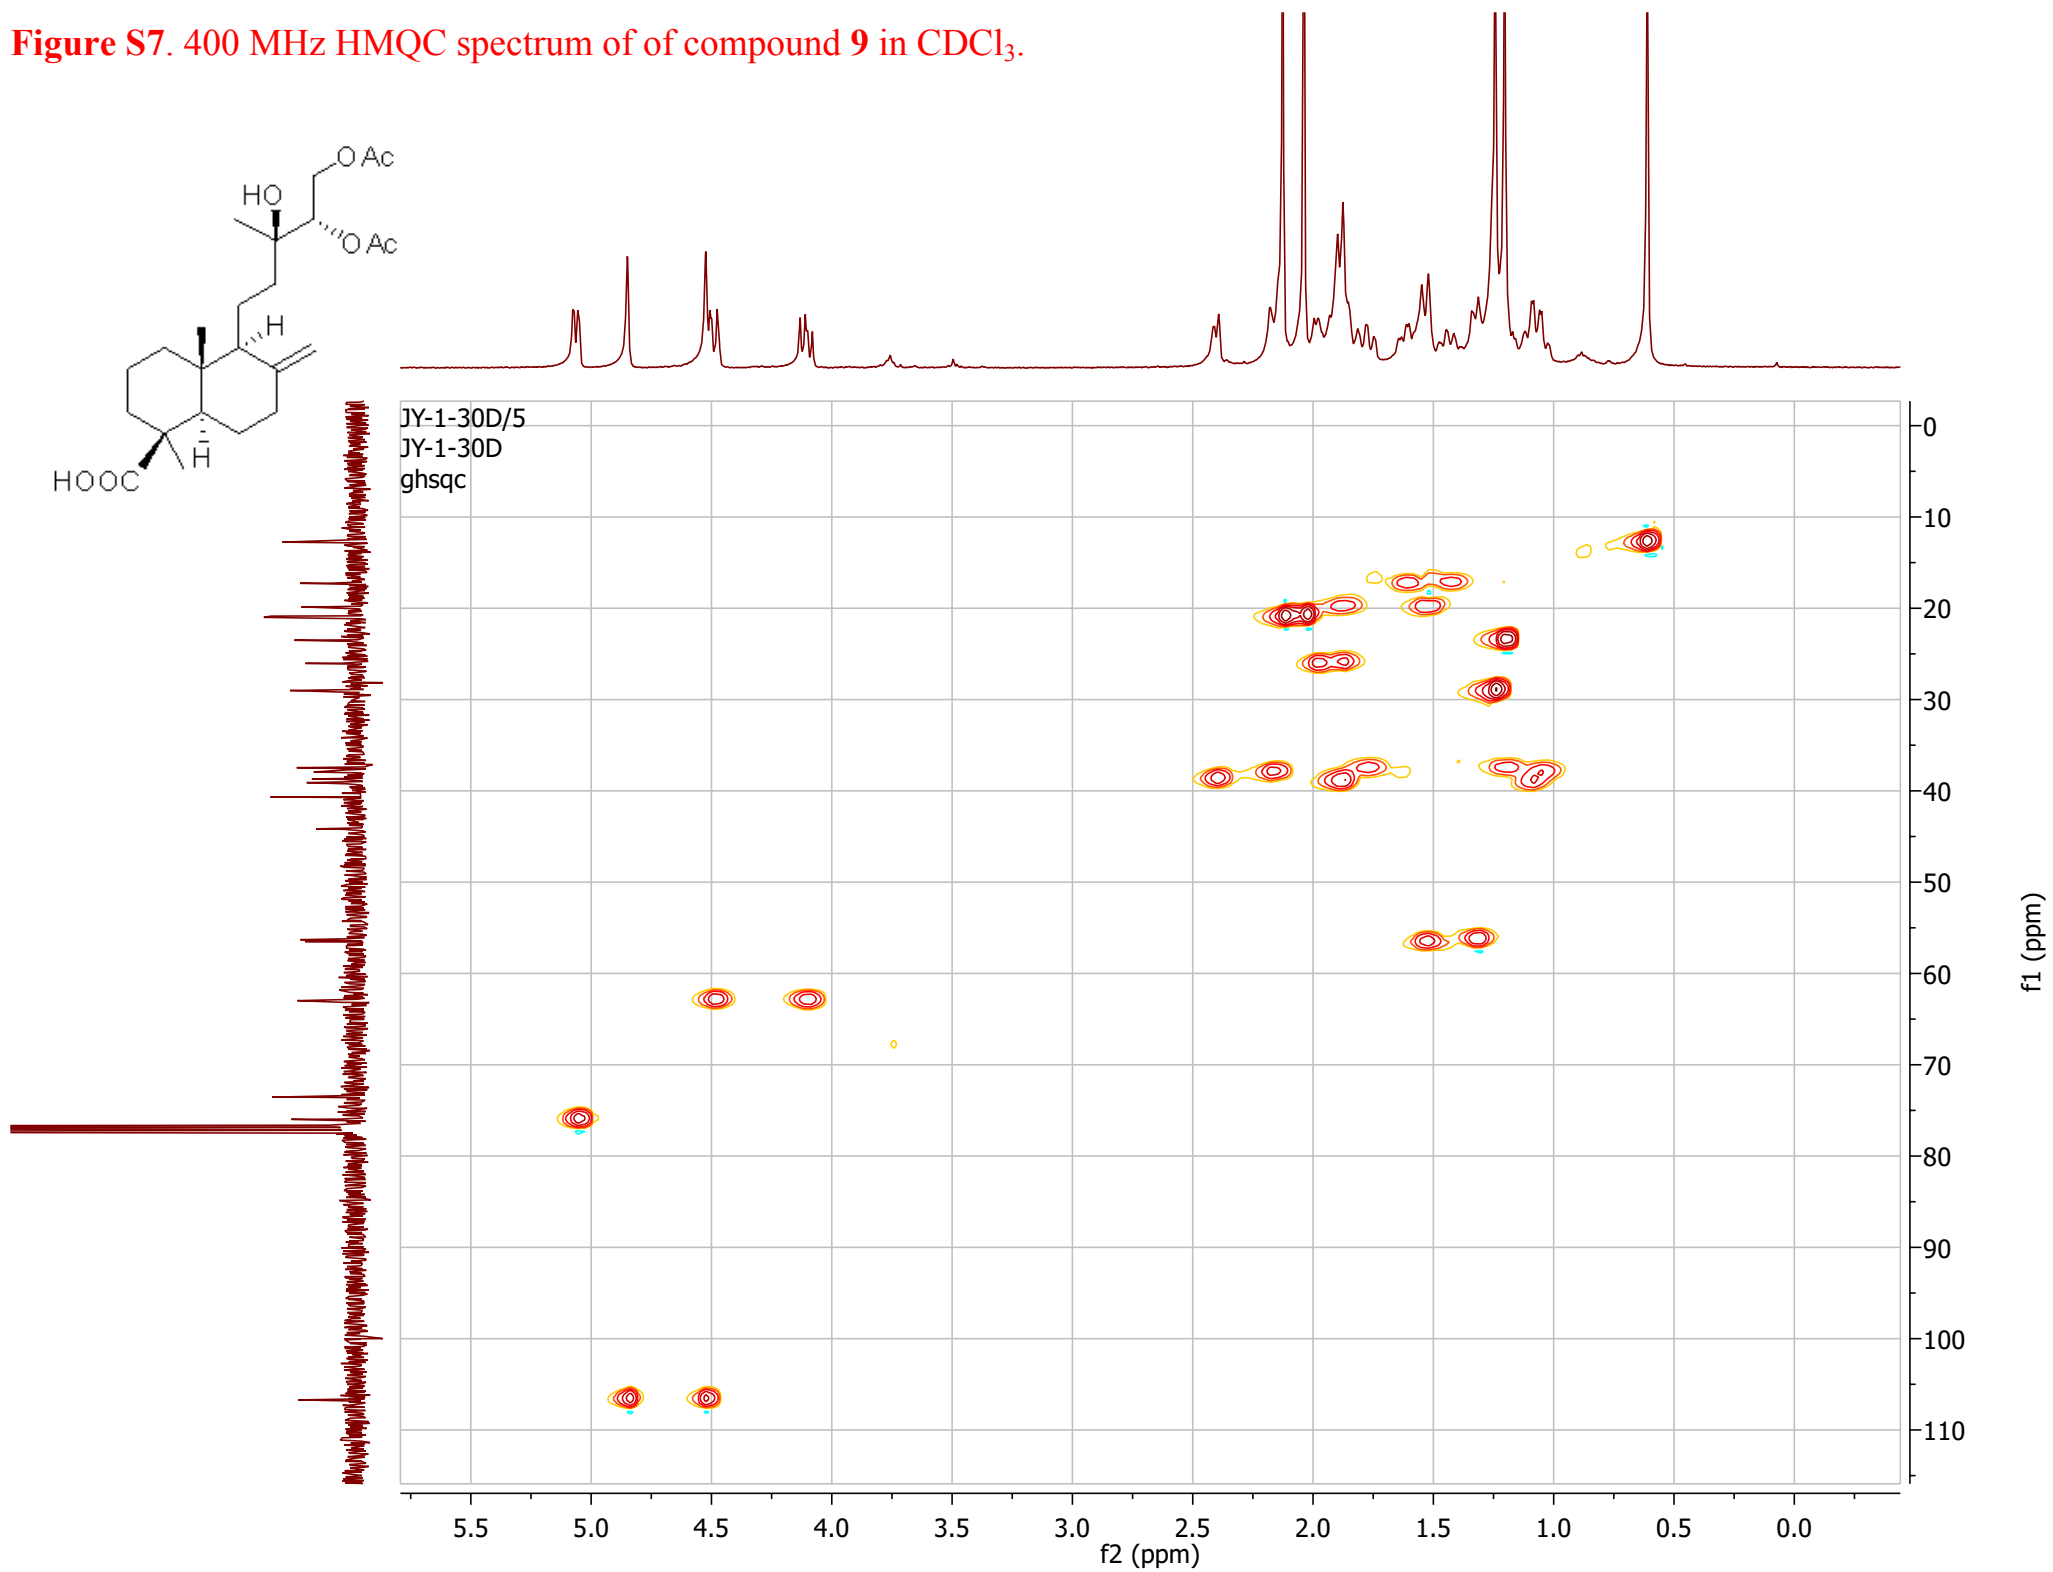



**Figure S8.** 400 MHz HMBC spectrum of of compound **9** in CDCl<sub>3</sub>.

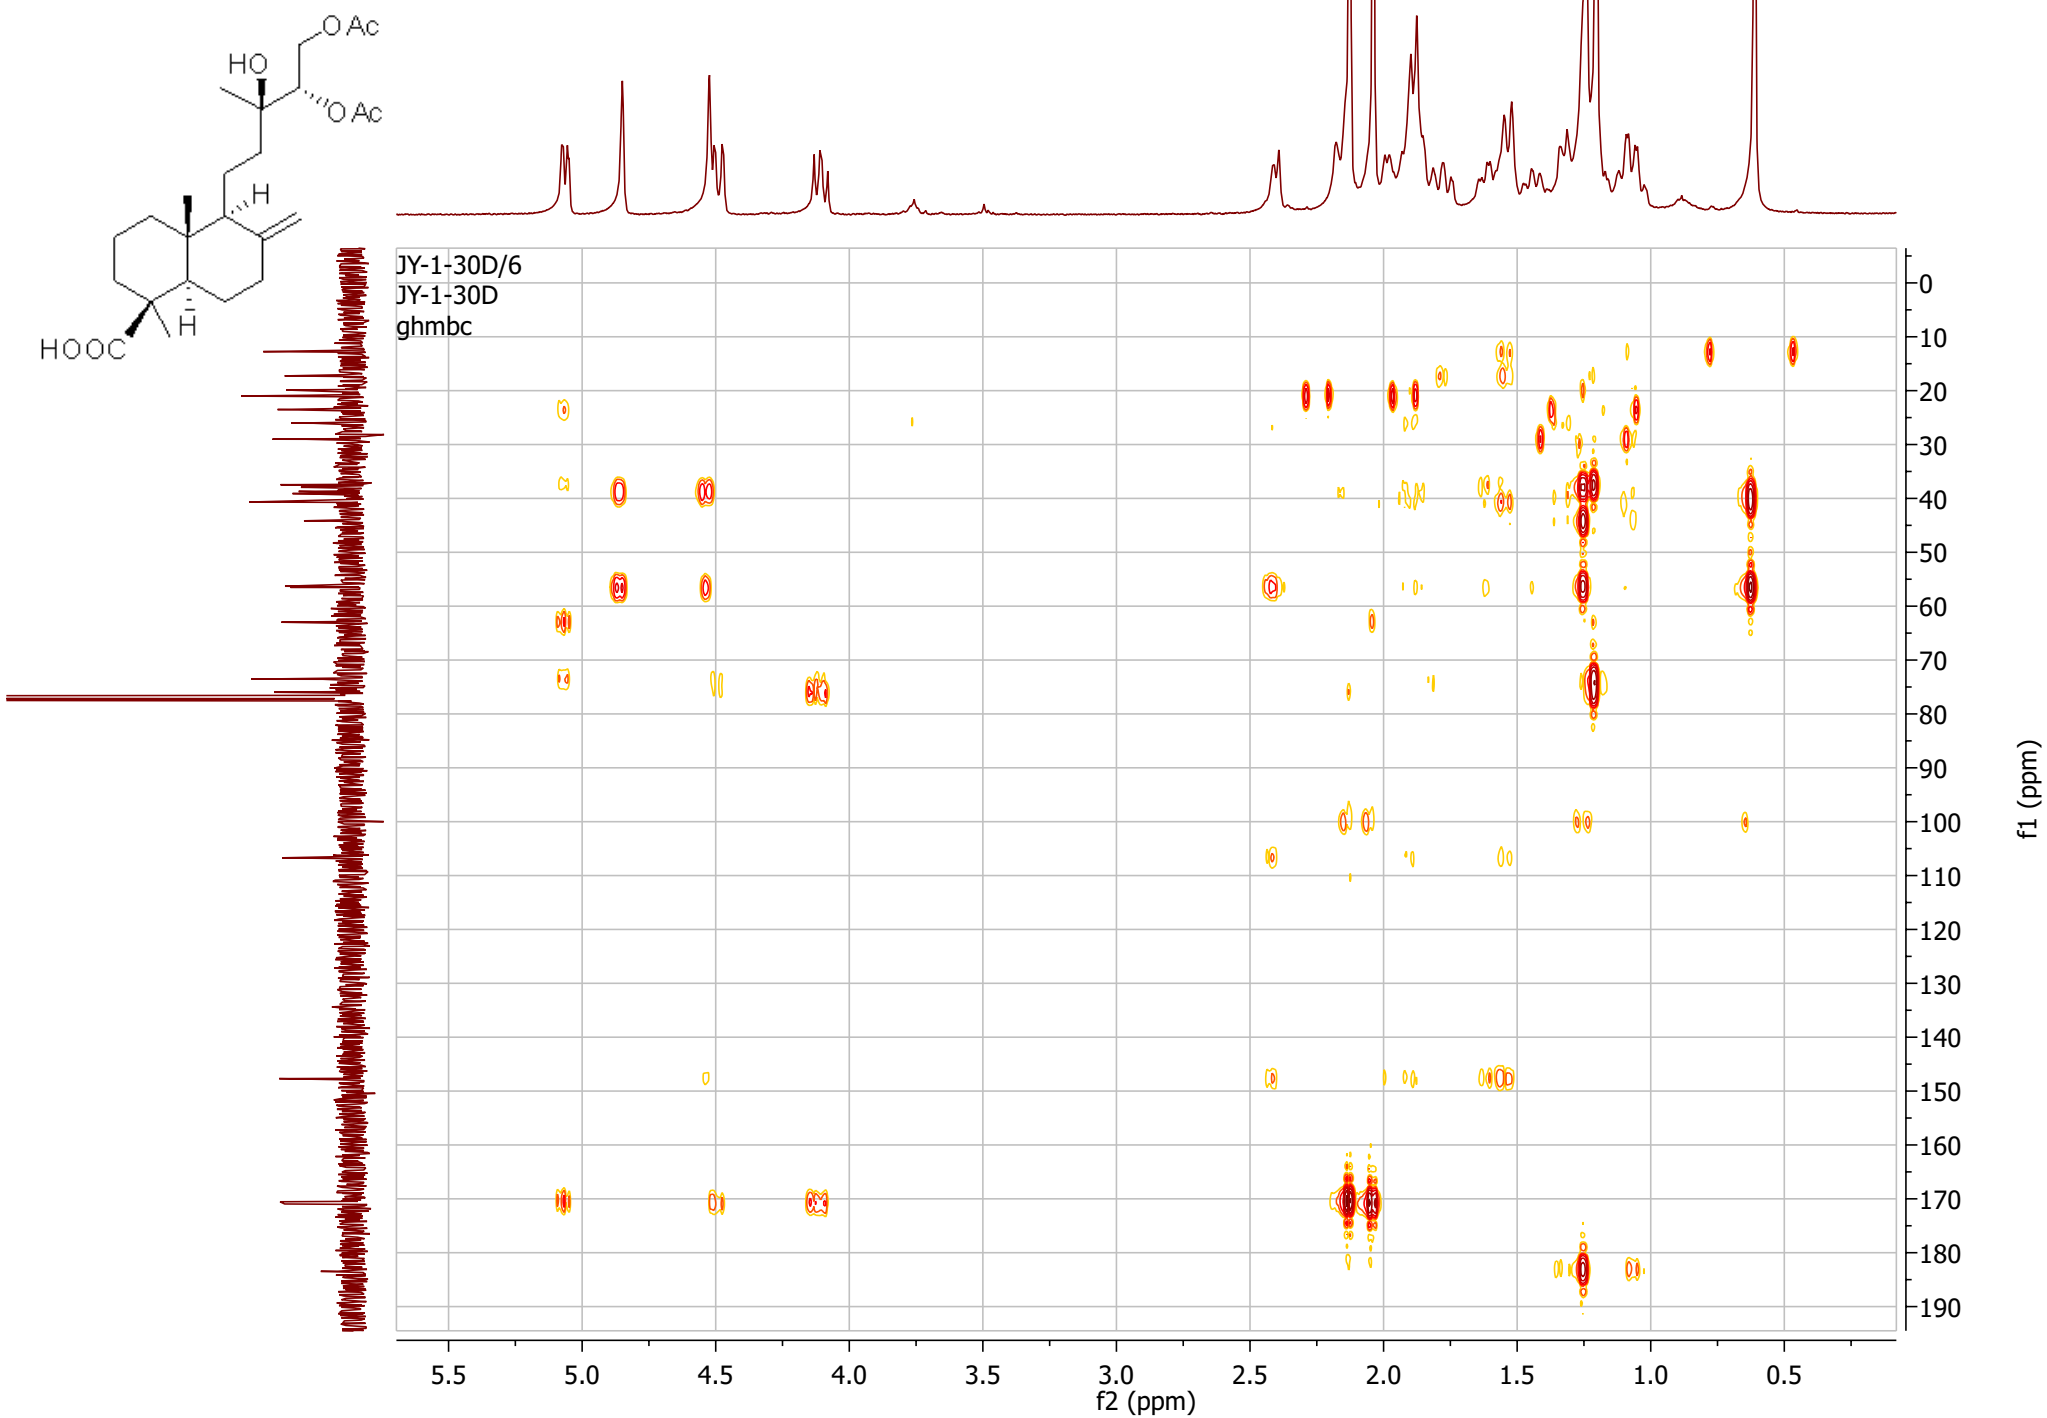

**Figure S9.** 400 MHz NOESY spectrum of of compound **9** in CDCl<sub>3</sub>.

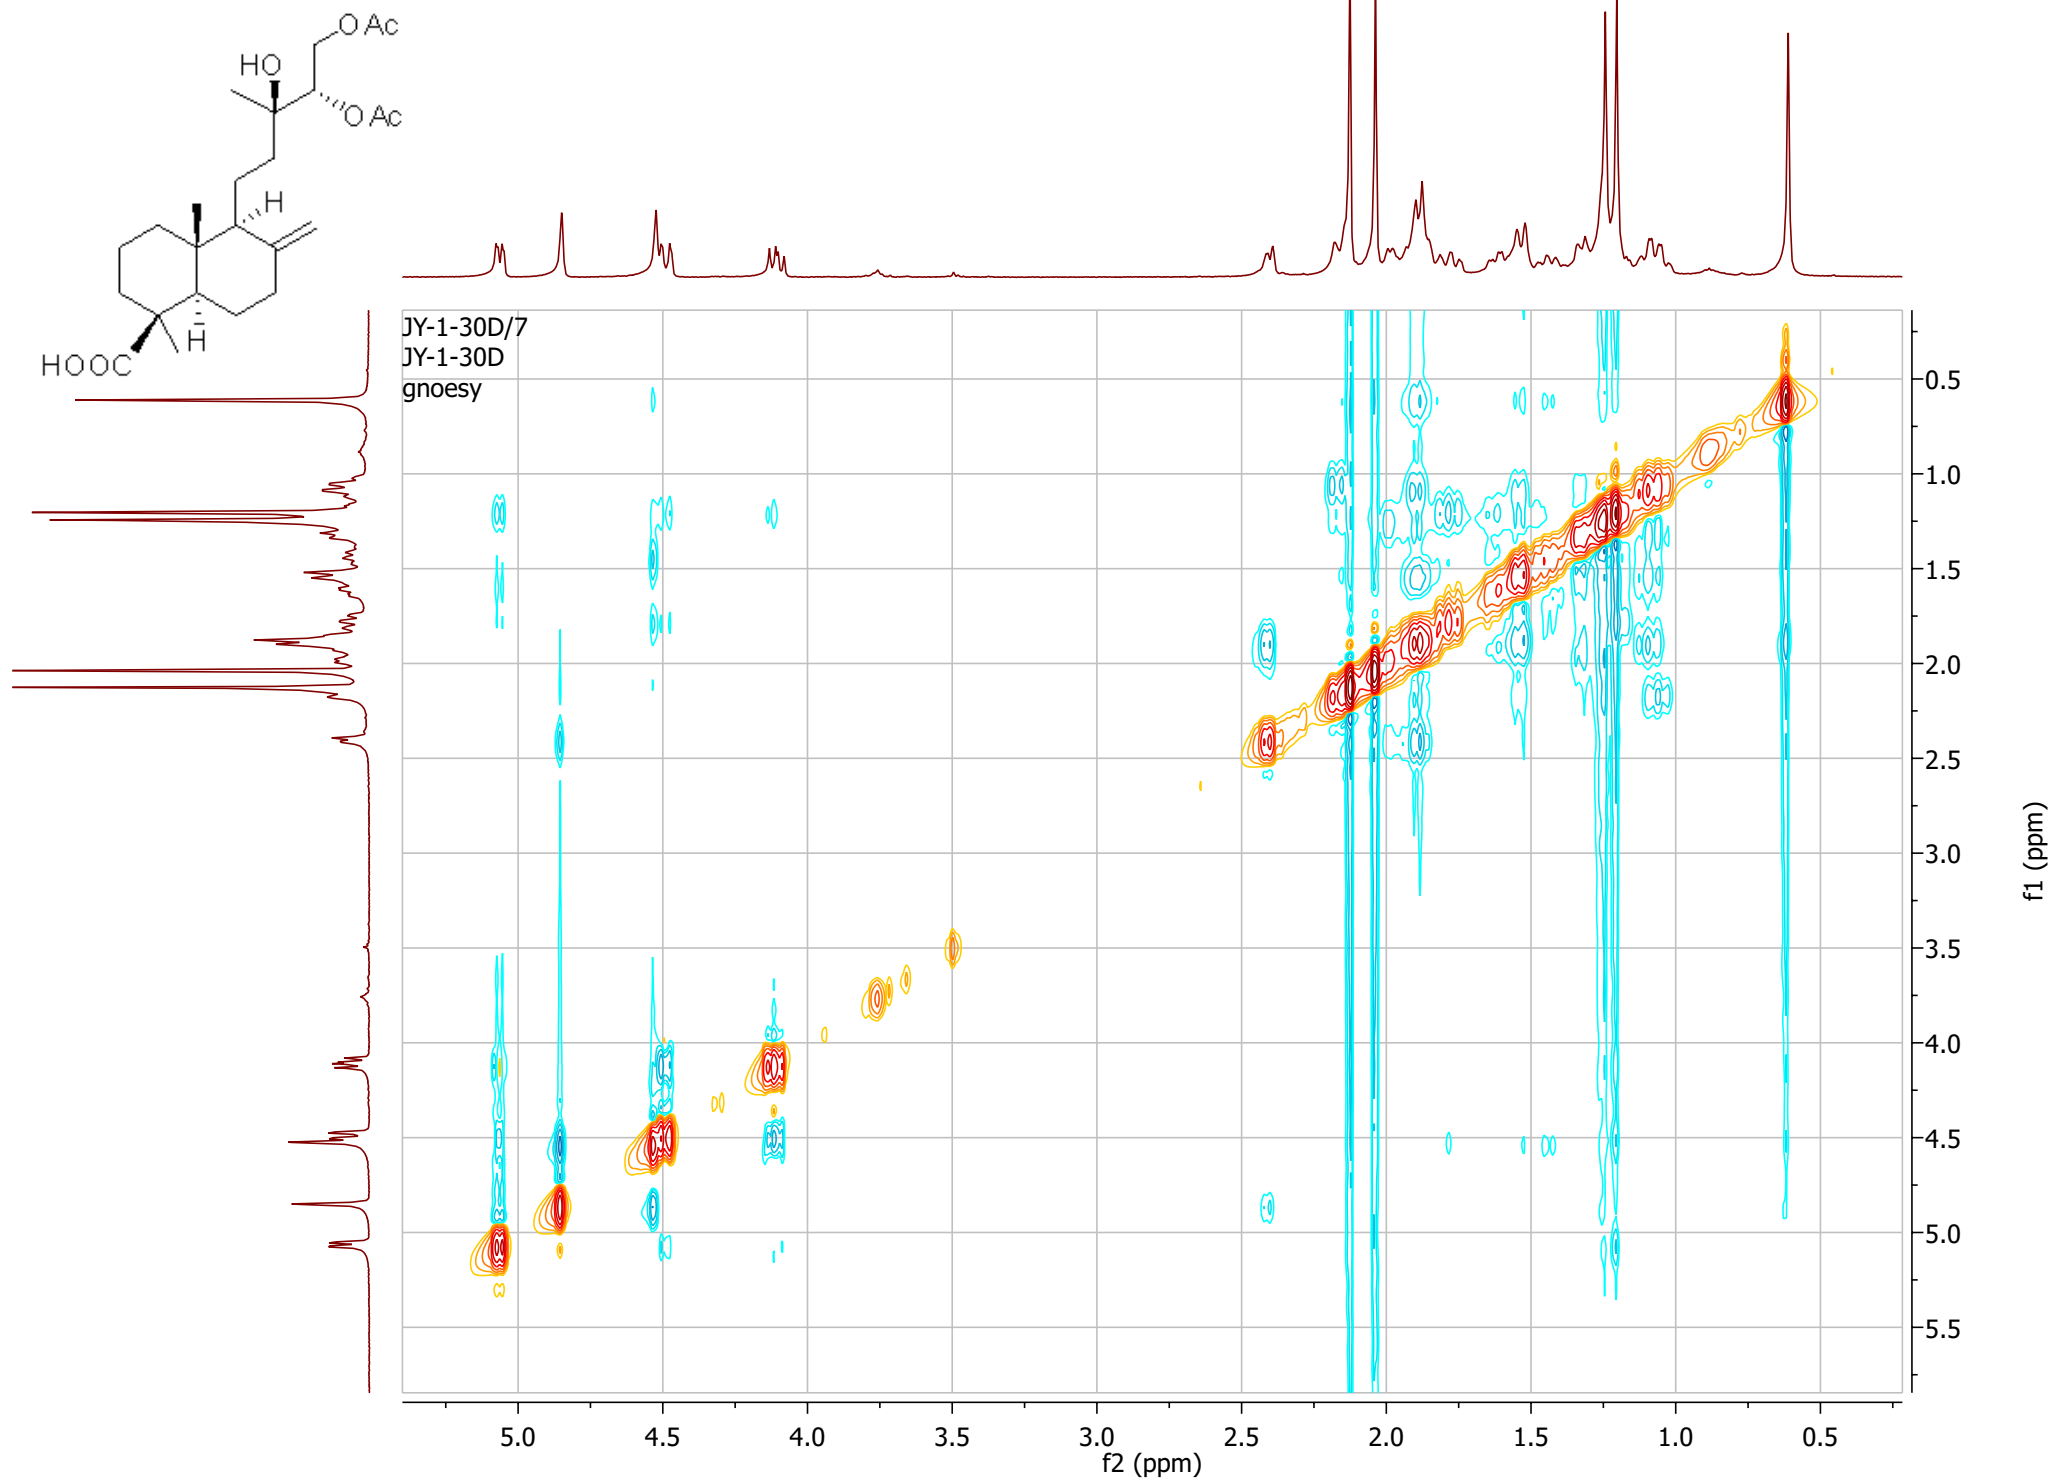

Figure S10. 400 MHz <sup>1</sup>H NMR spectrum of compound **10** in CDCl<sub>3</sub>.

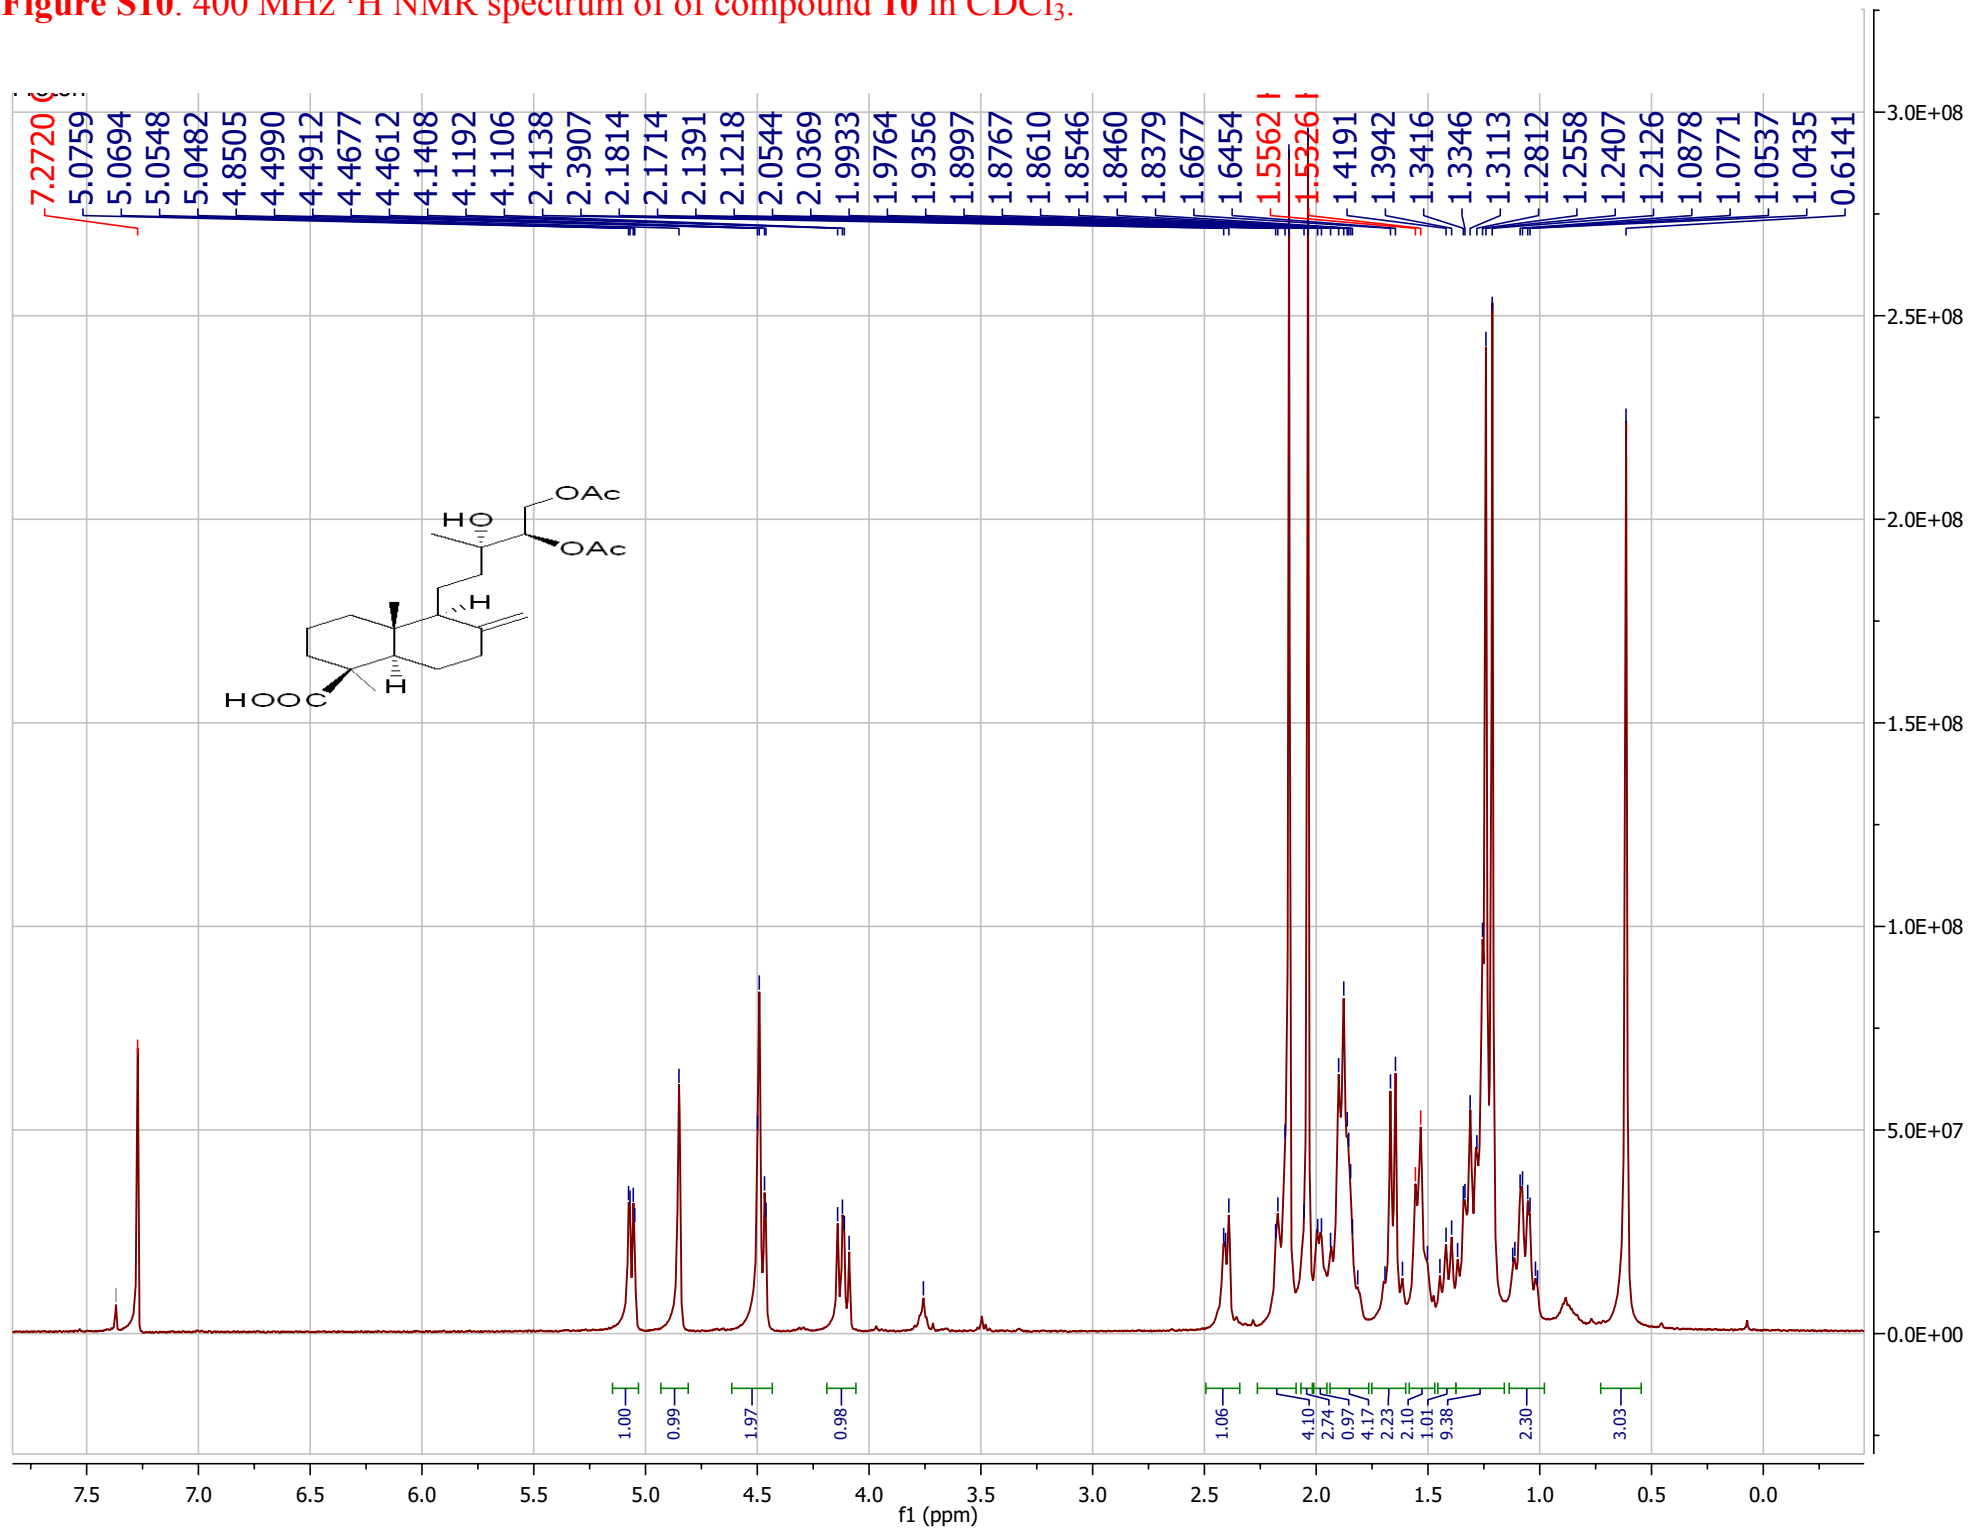

**Figure S11.** 100 MHz  $^{13}\text{C}$  NMR spectrum of compound **10** in  $\text{CDCl}_3$ .

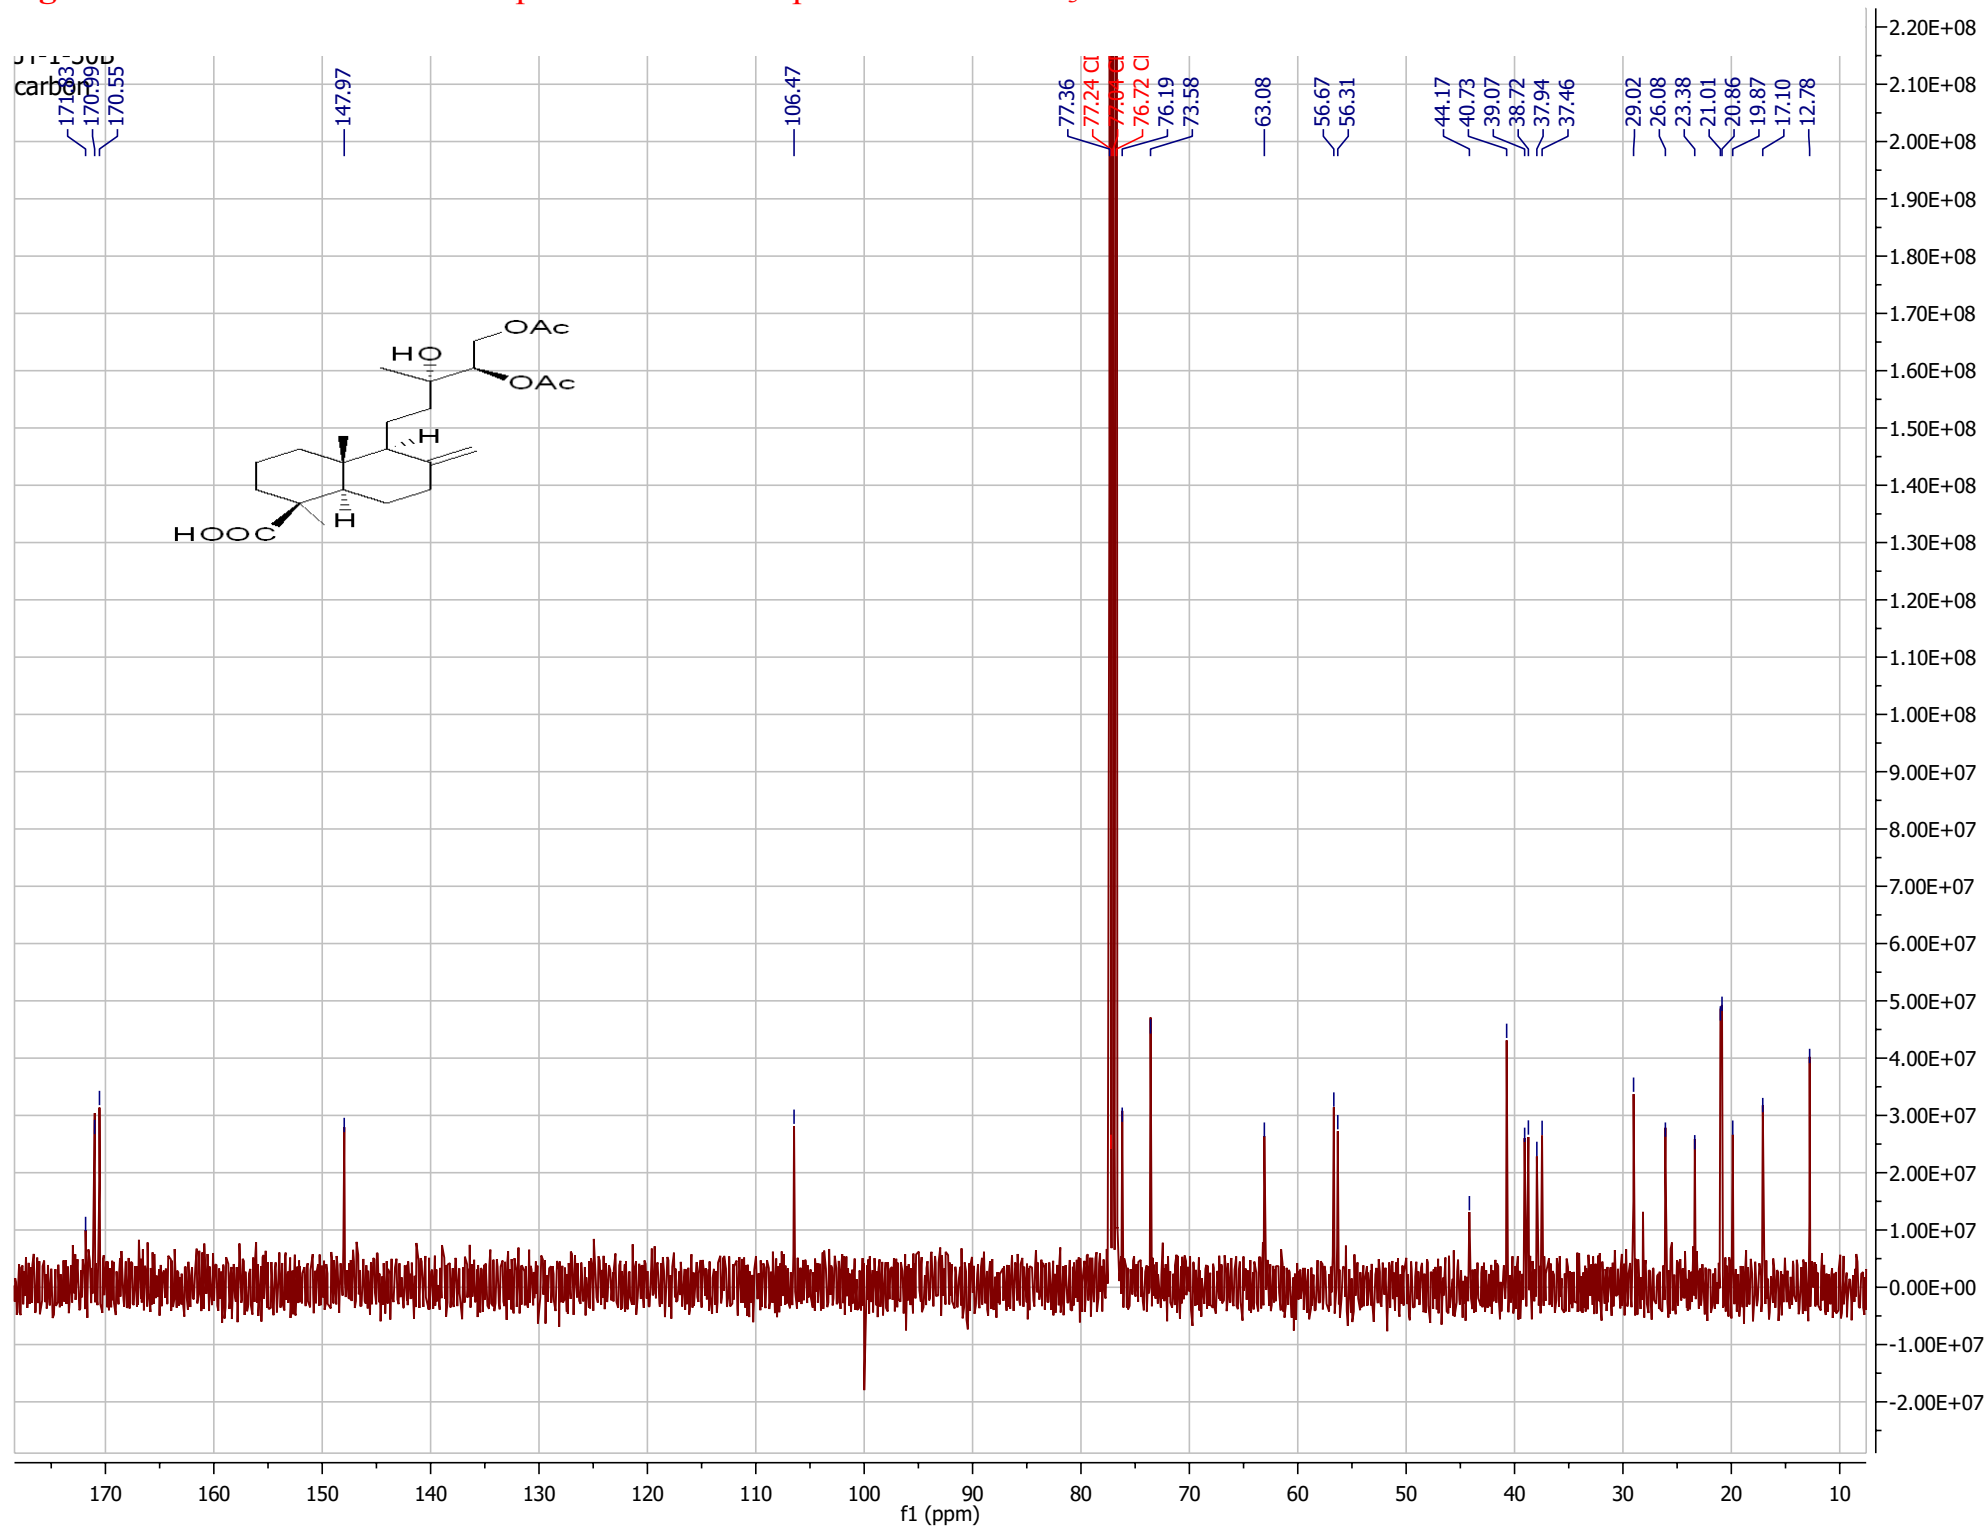

**Figure S12.** 400 MHz HMQC spectrum of of compound **10** in CDCl<sub>3</sub>.

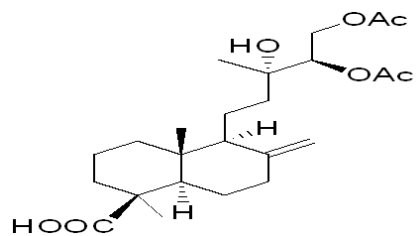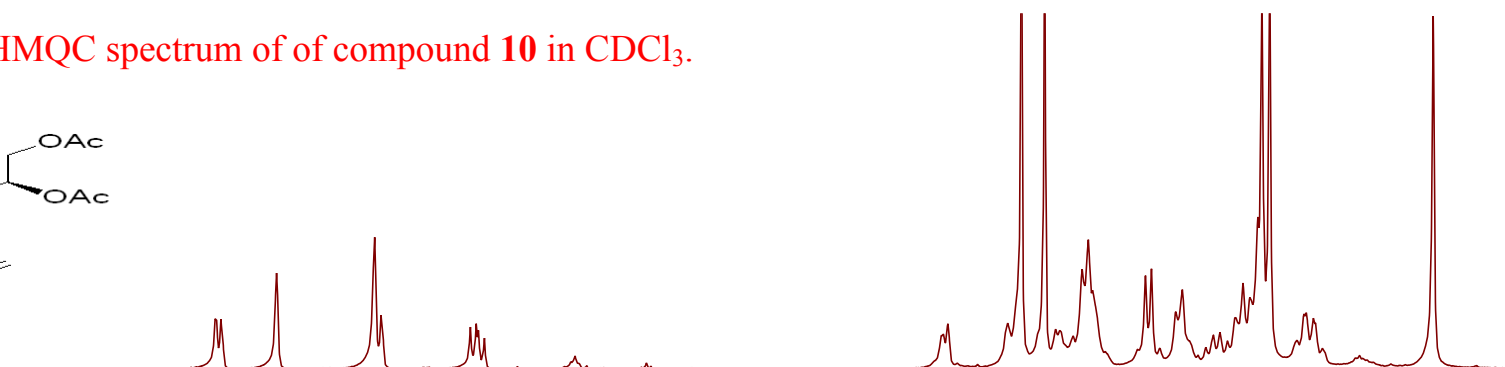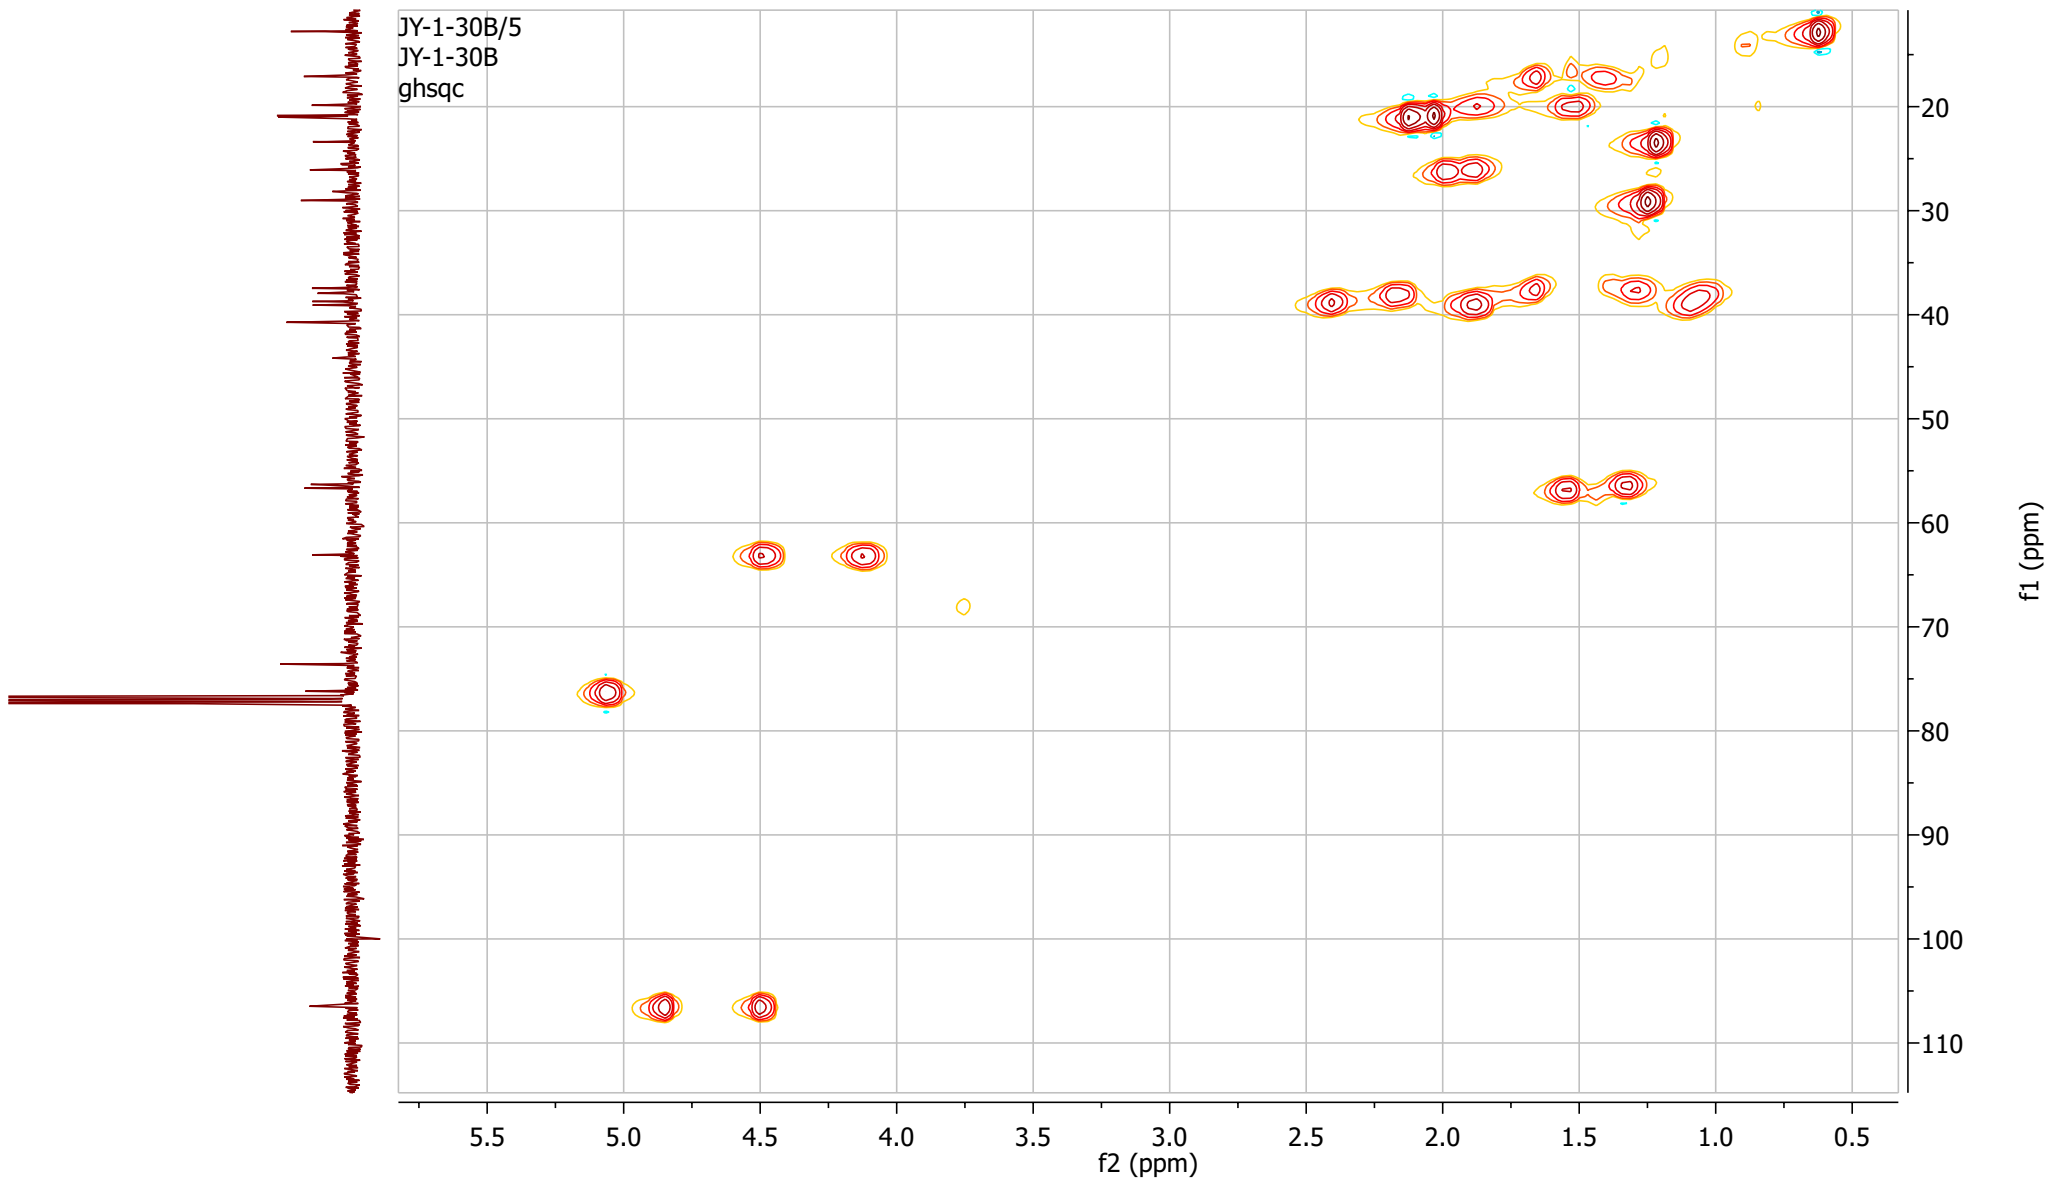

Figure S13. 400 MHz HMBC spectrum of of compound **10** in CDCl<sub>3</sub>.

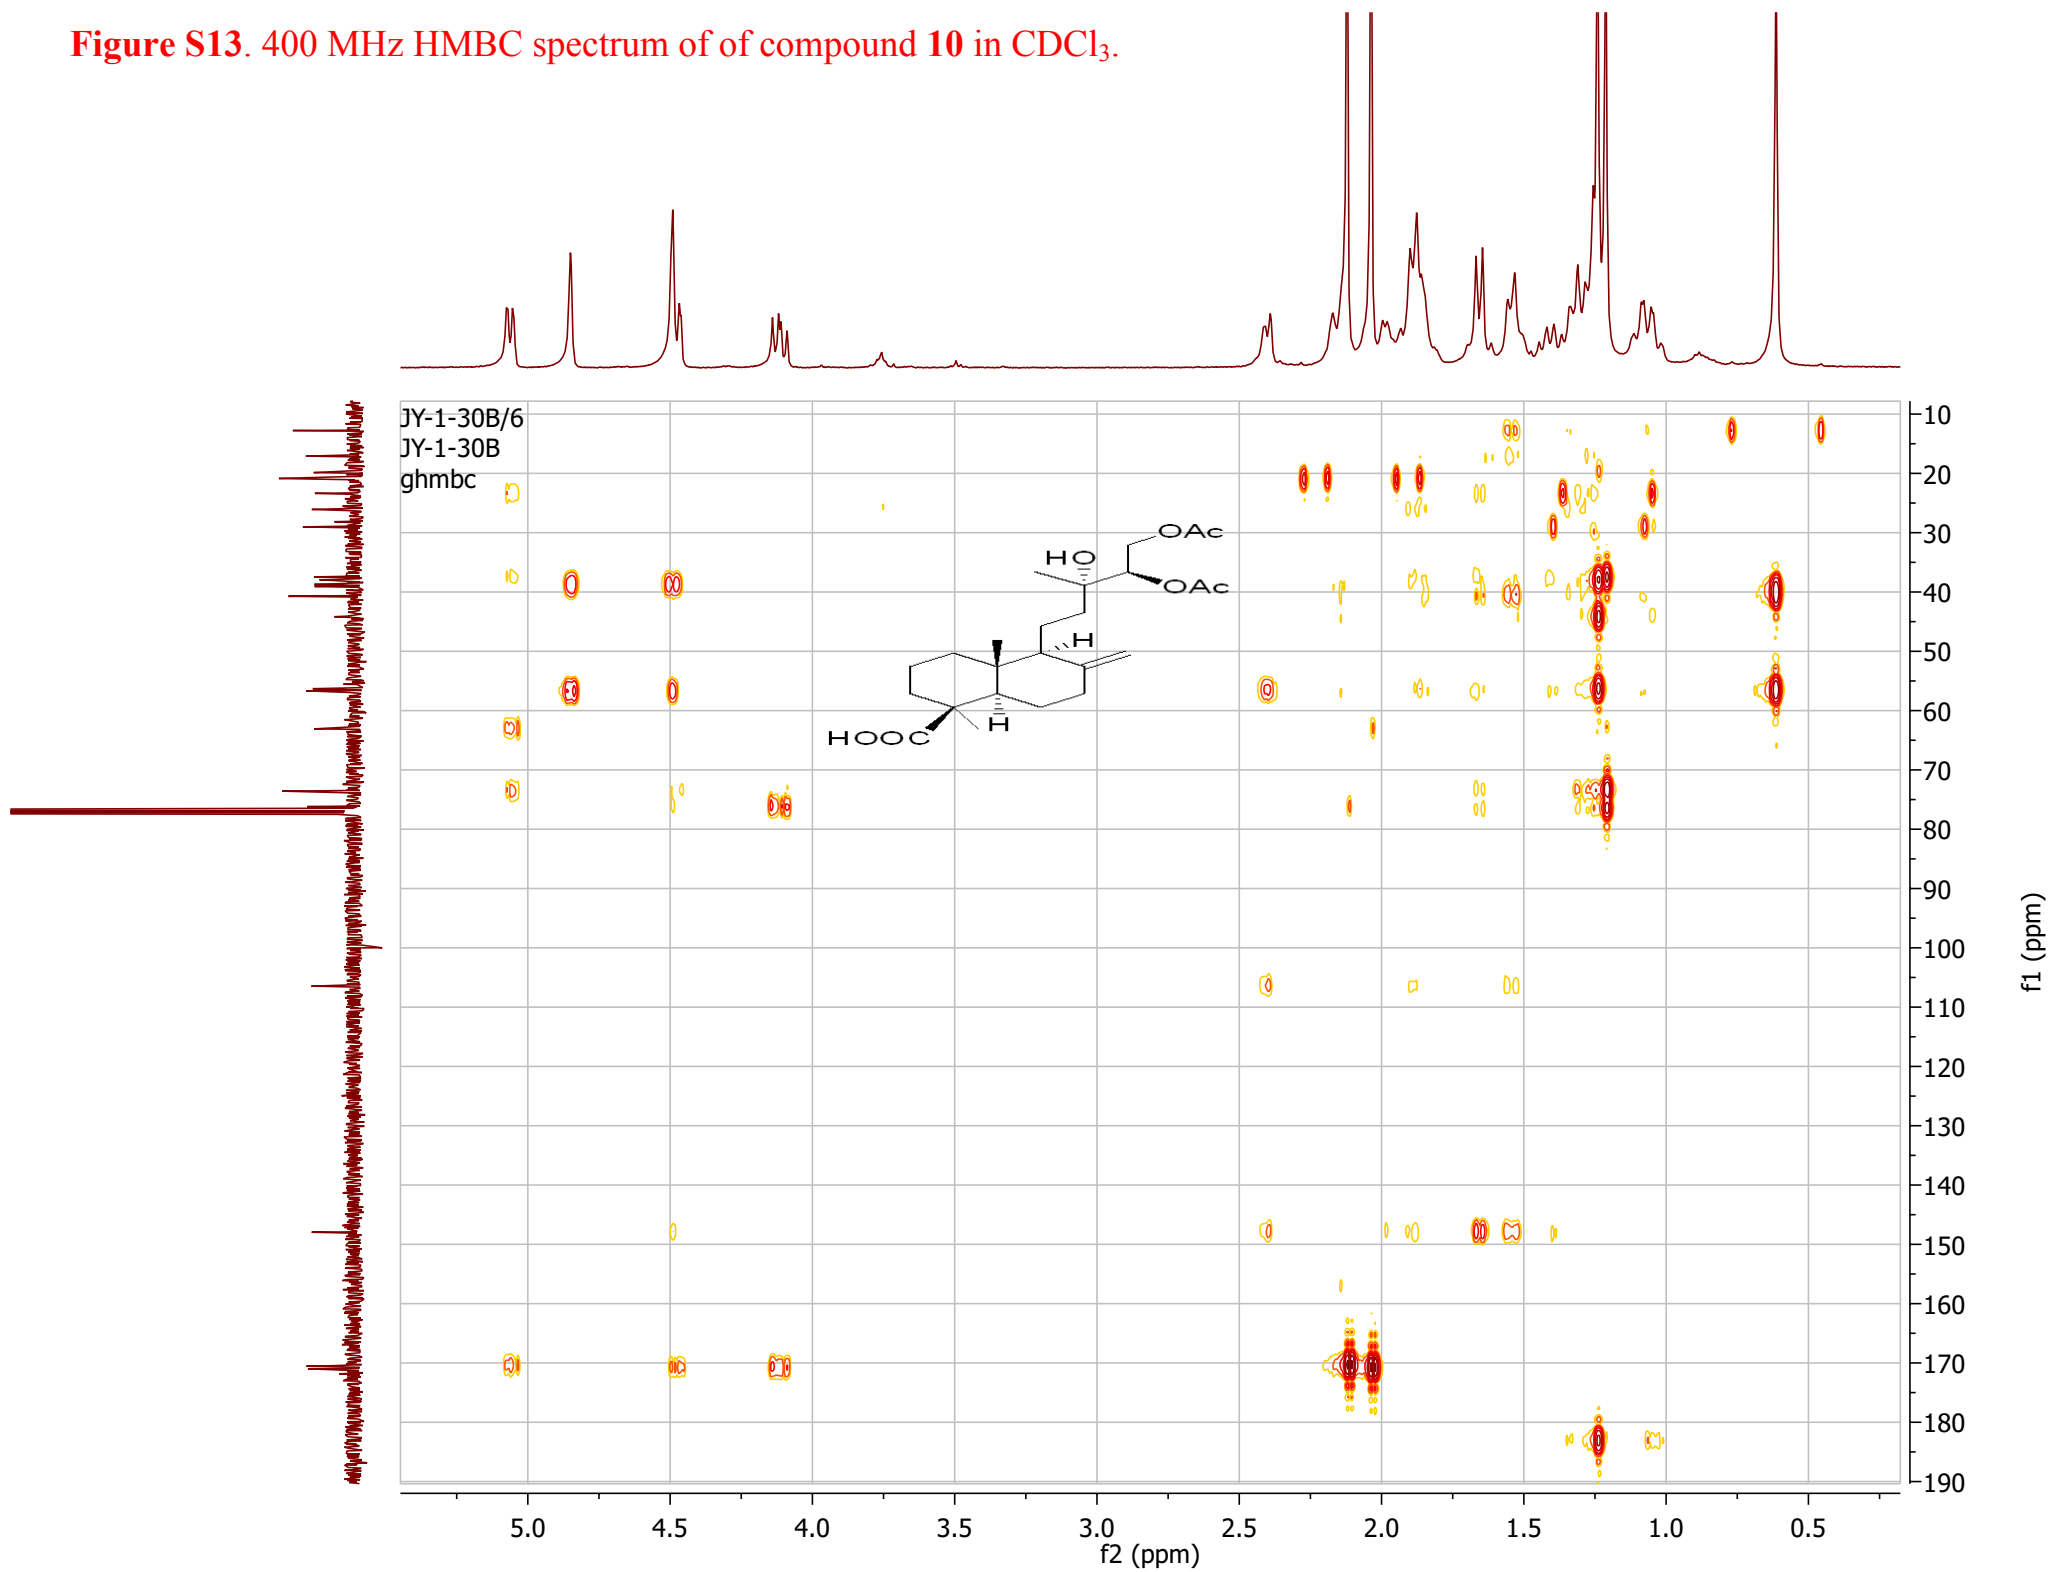

**Figure S14.** UPLC-MS data showing deoxypodorhizone in 79864-c9 from the stem of *Thuja occidentalis*.

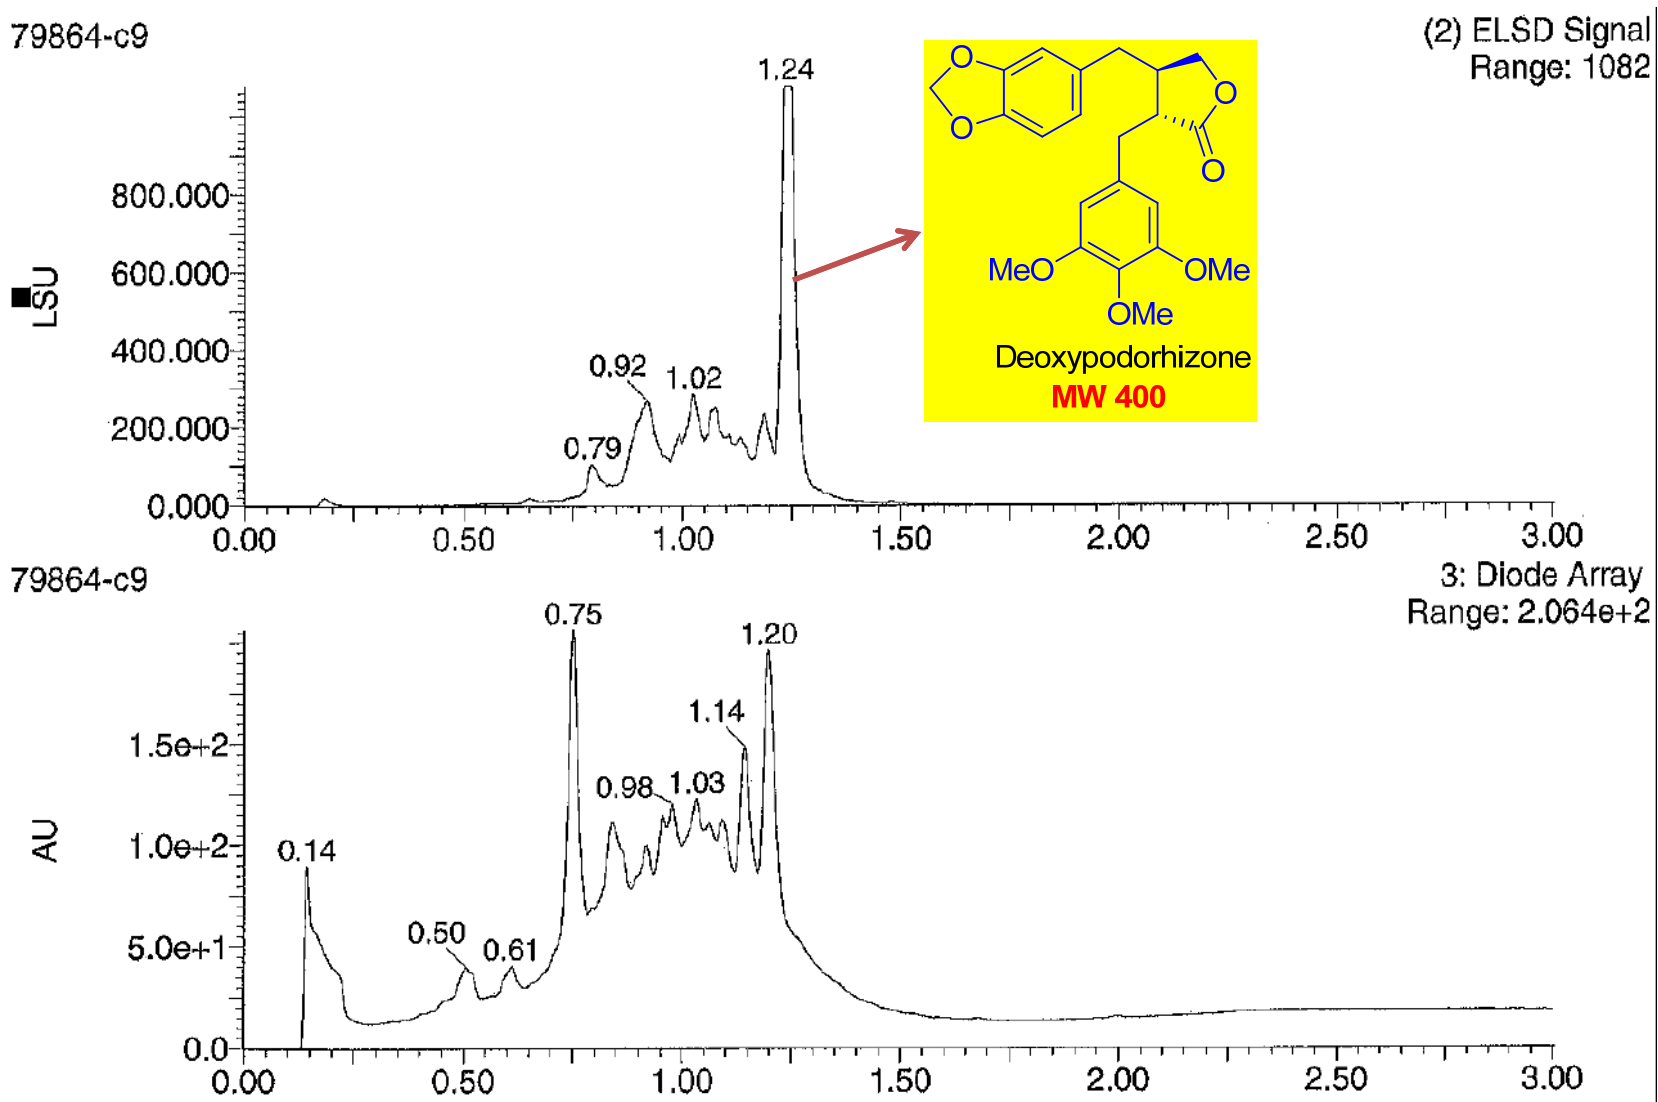

**Figure S15.** 400 MHz  $^1\text{H}$  NMR spectrum of 79864-c9 (0.4 mg) indicating the presence of doxypodorhizone.

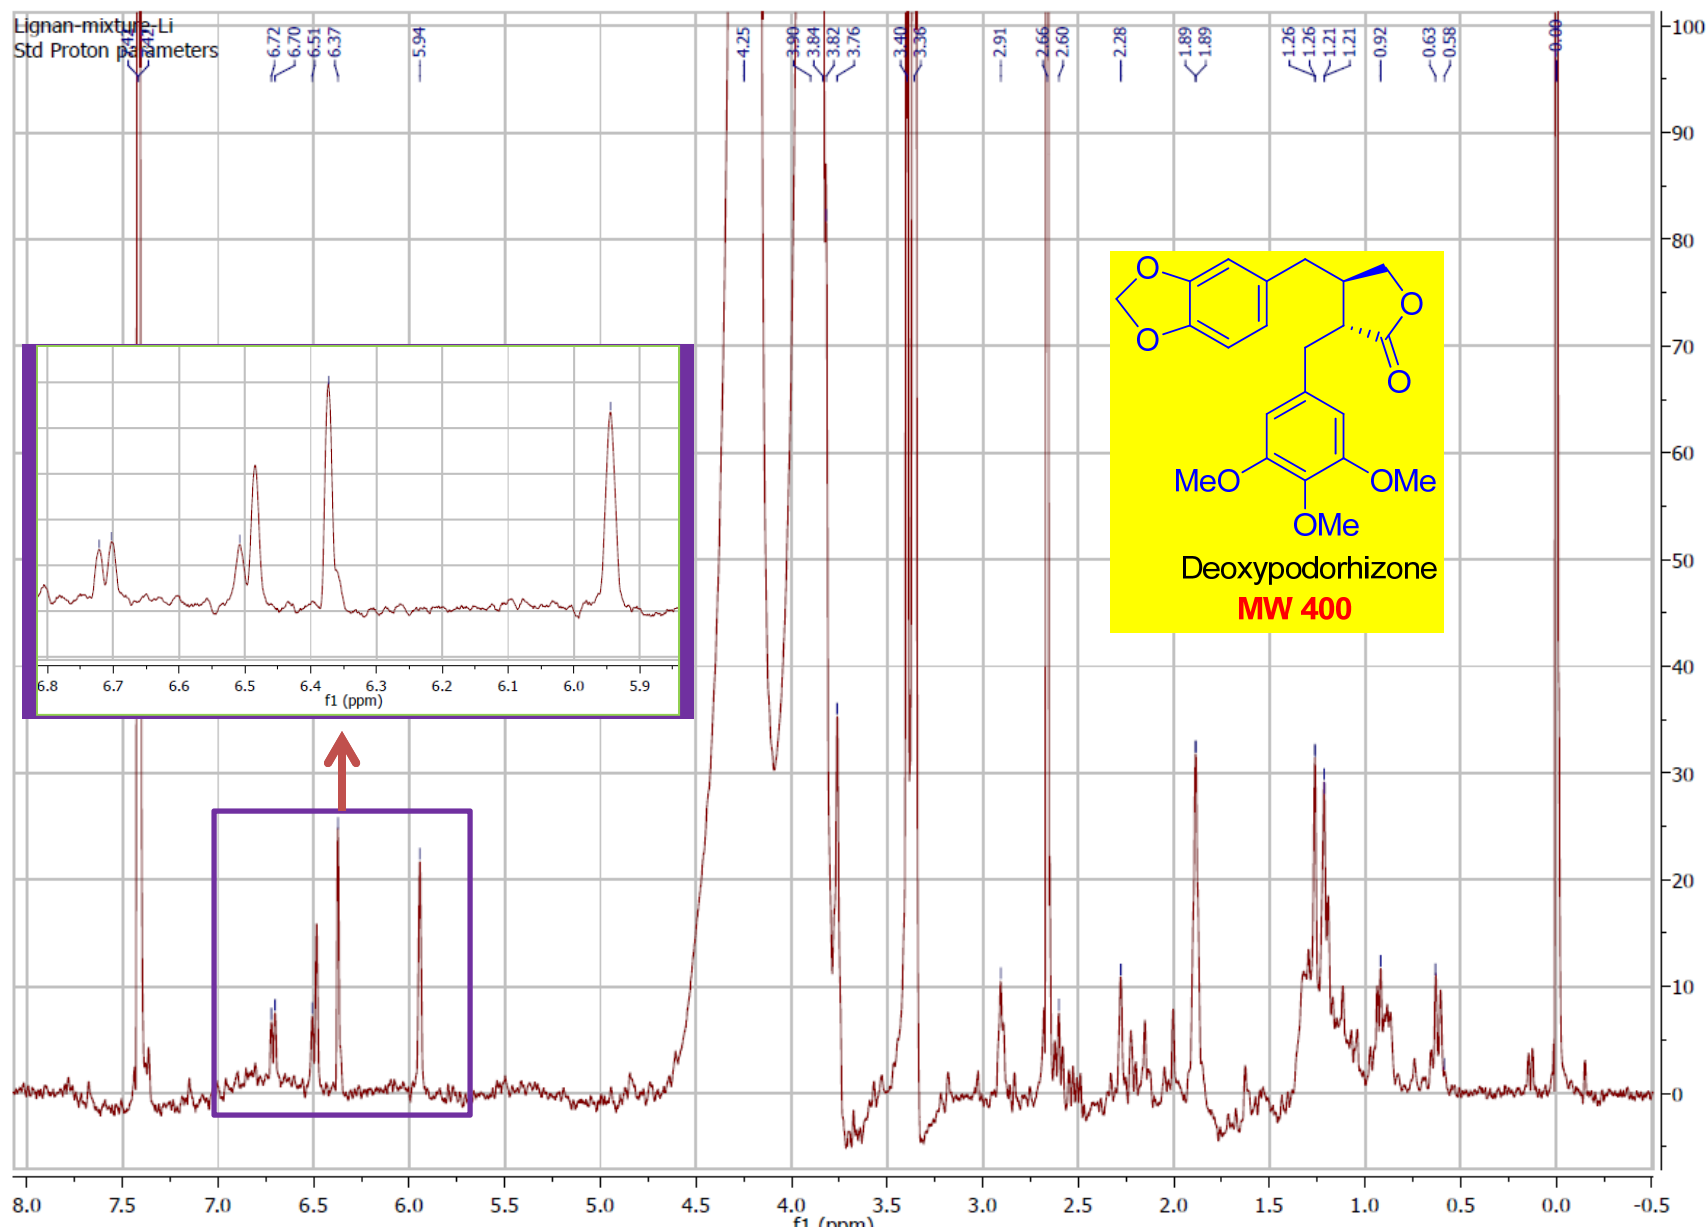



**Figure S16.** HRESIMS Spectrum of Compound **9**.

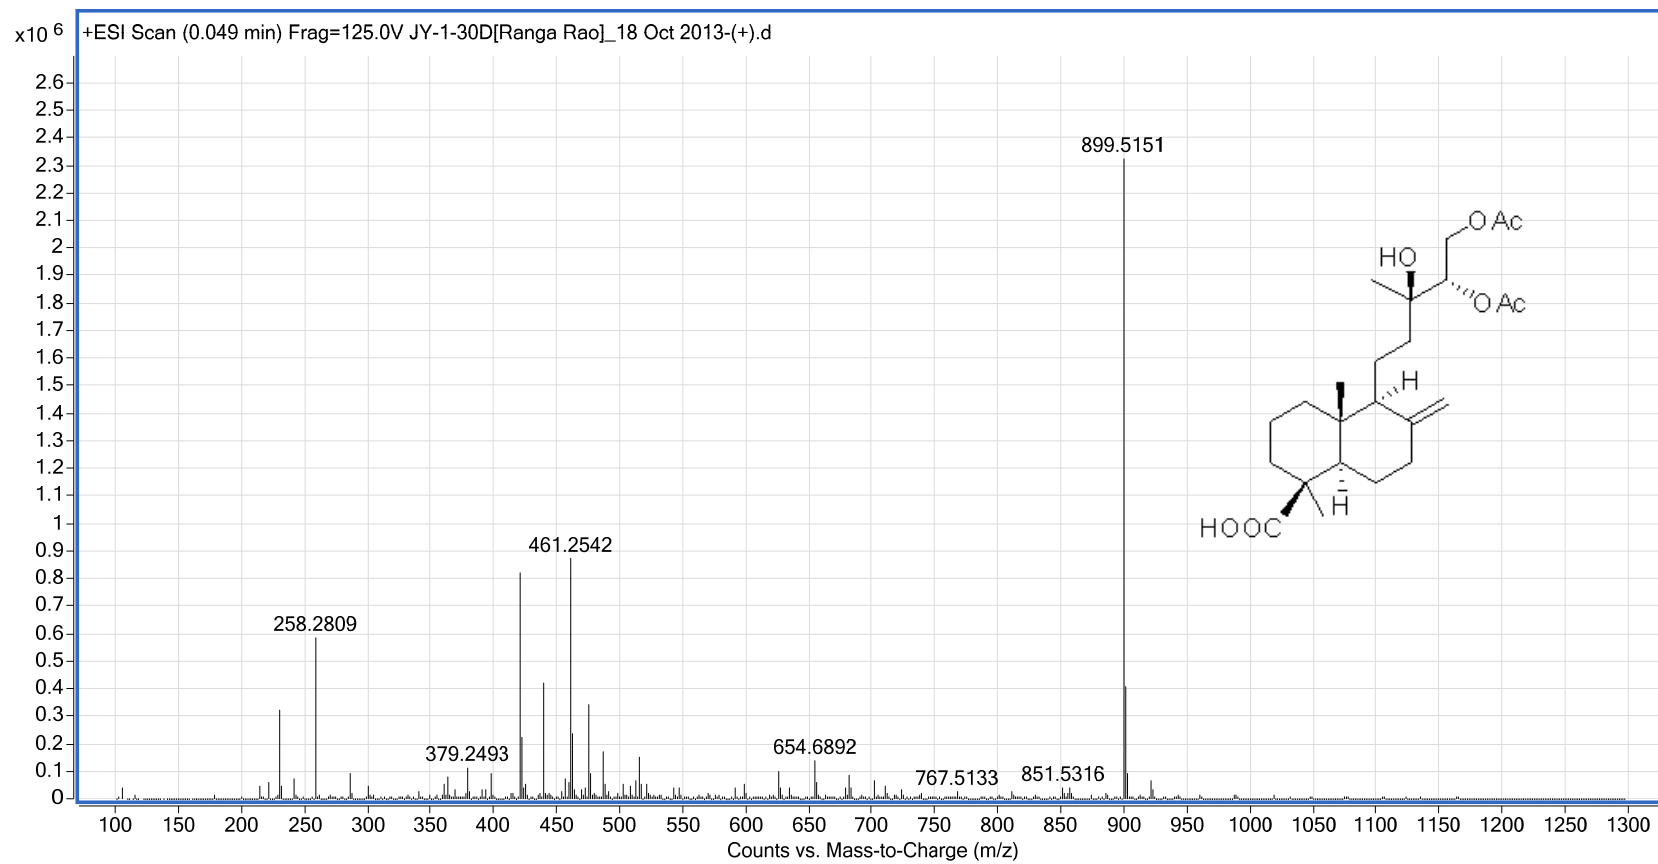

**Figure S17. HRESIMS Spectrum of Compound 10.**

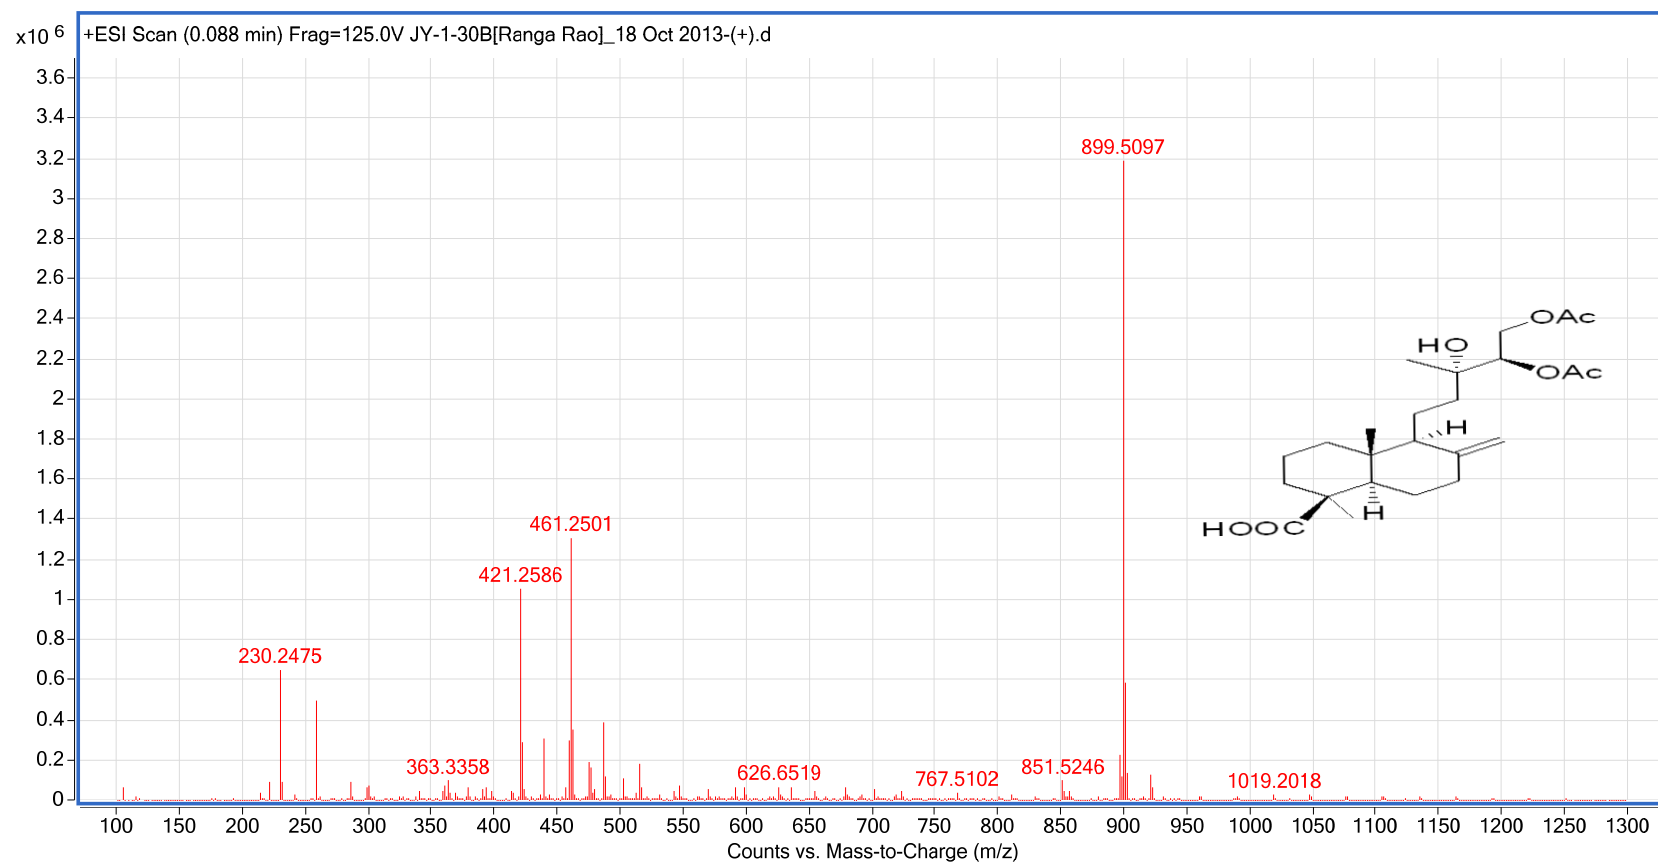

**Table S2.** Atomic coordinates ( $\times 10^4$ ) and equivalent isotropic displacement parameters ( $\text{\AA}^2 \times 10^3$ ) for compound\_9.  $U(\text{eq})$  is defined as one third of the trace of the orthogonalized  $U_{ij}$  tensor.

|       | x        | y        | z        | U(eq) |
|-------|----------|----------|----------|-------|
| O(1)  | 3355(2)  | 5322(1)  | 9437(2)  | 32(1) |
| O(2)  | 1354(2)  | 5539(1)  | 11619(2) | 27(1) |
| O(3)  | 817(2)   | 9658(1)  | 9641(2)  | 21(1) |
| O(4)  | 4810(2)  | 9338(1)  | 5597(2)  | 22(1) |
| O(5)  | 4577(2)  | 8406(1)  | 4839(2)  | 32(1) |
| O(6)  | 1223(2)  | 9760(1)  | 6171(2)  | 19(1) |
| O(7)  | 1010(2)  | 9416(1)  | 3318(2)  | 30(1) |
| C(1)  | 4245(3)  | 7069(1)  | 8856(3)  | 22(1) |
| C(2)  | 5266(3)  | 6504(1)  | 8498(3)  | 26(1) |
| C(3)  | 5845(3)  | 6205(1)  | 10268(3) | 26(1) |
| C(4)  | 4189(3)  | 6095(1)  | 11527(3) | 22(1) |
| C(5)  | 3169(3)  | 6680(1)  | 11861(2) | 19(1) |
| C(6)  | 1639(3)  | 6661(1)  | 13301(2) | 22(1) |
| C(7)  | 956(3)   | 7265(1)  | 13773(3) | 24(1) |
| C(8)  | 295(3)   | 7561(1)  | 12047(2) | 21(1) |
| C(9)  | 1851(3)  | 7616(1)  | 10676(2) | 18(1) |
| C(10) | 2529(2)  | 7004(1)  | 10077(2) | 18(1) |
| C(11) | 1364(3)  | 8033(1)  | 9105(2)  | 19(1) |
| C(12) | 1326(3)  | 8644(1)  | 9879(2)  | 19(1) |
| C(13) | 601(2)   | 9129(1)  | 8640(2)  | 18(1) |
| C(14) | 1758(2)  | 9202(1)  | 6918(2)  | 17(1) |
| C(15) | 3876(3)  | 9217(1)  | 7279(2)  | 20(1) |
| C(16) | -1476(3) | 9051(1)  | 8092(3)  | 23(1) |
| C(17) | -1490(3) | 7718(1)  | 11776(3) | 26(1) |
| C(18) | 2931(3)  | 5619(1)  | 10717(3) | 23(1) |
| C(19) | 5004(3)  | 5859(1)  | 13358(3) | 29(1) |
| C(20) | 926(3)   | 6699(1)  | 9005(2)  | 20(1) |
| C(21) | 5055(2)  | 8884(1)  | 4480(3)  | 23(1) |
| C(22) | 6032(3)  | 9062(1)  | 2787(3)  | 32(1) |
| C(23) | 927(2)   | 9811(1)  | 4377(2)  | 20(1) |
| C(24) | 468(3)   | 10413(1) | 3829(3)  | 29(1) |

**Table S1.** Crystal data and structure refinement for compound **9**.

|                                   |                                                |                   |
|-----------------------------------|------------------------------------------------|-------------------|
| Identification code               | shelx                                          |                   |
| Empirical formula                 | C <sub>24</sub> H <sub>38</sub> O <sub>7</sub> |                   |
| Formula weight                    | 438.54                                         |                   |
| Temperature                       | 100(2) K                                       |                   |
| Wavelength                        | 1.54178 Å                                      |                   |
| Crystal system                    | Monoclinic                                     |                   |
| Space group                       | P 21                                           |                   |
| Unit cell dimensions              | a = 7.0889(2) Å                                | α = 90°.          |
|                                   | b = 23.3669(5) Å                               | β = 91.7930(10)°. |
|                                   | c = 7.3183(2) Å                                | γ = 90°.          |
| Volume                            | 1211.65(5) Å <sup>3</sup>                      |                   |
| Z                                 | 2                                              |                   |
| Density (calculated)              | 1.202 Mg/m <sup>3</sup>                        |                   |
| Absorption coefficient            | 0.712 mm <sup>-1</sup>                         |                   |
| F(000)                            | 476                                            |                   |
| Crystal size                      | 0.400 x 0.200 x 0.190 mm <sup>3</sup>          |                   |
| Theta range for data collection   | 3.783 to 69.591°.                              |                   |
| Index ranges                      | -8<=h<=8, -27<=k<=27, -8<=l<=8                 |                   |
| Reflections collected             | 9933                                           |                   |
| Independent reflections           | 3954 [R(int) = 0.0209]                         |                   |
| Completeness to theta = 67.679°   | 98.4 %                                         |                   |
| Absorption correction             | Semi-empirical from equivalents                |                   |
| Max. and min. transmission        | 0.8767 and 0.7639                              |                   |
| Refinement method                 | Full-matrix least-squares on F <sup>2</sup>    |                   |
| Data / restraints / parameters    | 3954 / 1 / 288                                 |                   |
| Goodness-of-fit on F <sup>2</sup> | 1.039                                          |                   |
| Final R indices [I>2sigma(I)]     | R1 = 0.0259, wR2 = 0.0693                      |                   |
| R indices (all data)              | R1 = 0.0260, wR2 = 0.0694                      |                   |
| Absolute structure parameter      | 0.09(3)                                        |                   |
| Extinction coefficient            | 0.0031(6)                                      |                   |
| Largest diff. peak and hole       | 0.198 and -0.152 e.Å <sup>-3</sup>             |                   |

**Table S3.** Bond lengths [ $\text{\AA}$ ] and angles [ $^\circ$ ] for compound **9**.

---

|            |          |
|------------|----------|
| O(1)-C(18) | 1.212(2) |
| O(2)-C(18) | 1.330(2) |
| O(2)-H(2)  | 0.8400   |
| O(3)-C(13) | 1.444(2) |
| O(3)-H(3)  | 0.8400   |
| O(4)-C(21) | 1.355(2) |
| O(4)-C(15) | 1.444(2) |
| O(5)-C(21) | 1.197(3) |
| O(6)-C(23) | 1.329(2) |
| O(6)-C(14) | 1.458(2) |
| O(7)-C(23) | 1.208(2) |
| C(1)-C(2)  | 1.532(3) |
| C(1)-C(10) | 1.539(3) |
| C(1)-H(1A) | 0.9900   |
| C(1)-H(1B) | 0.9900   |
| C(2)-C(3)  | 1.517(3) |
| C(2)-H(2A) | 0.9900   |
| C(2)-H(2B) | 0.9900   |
| C(3)-C(4)  | 1.536(3) |
| C(3)-H(3A) | 0.9900   |
| C(3)-H(3B) | 0.9900   |
| C(4)-C(18) | 1.533(3) |
| C(4)-C(19) | 1.545(3) |
| C(4)-C(5)  | 1.570(2) |
| C(5)-C(6)  | 1.536(2) |
| C(5)-C(10) | 1.564(2) |
| C(5)-H(5)  | 1.0000   |
| C(6)-C(7)  | 1.534(3) |
| C(6)-H(6A) | 0.9900   |
| C(6)-H(6B) | 0.9900   |
| C(7)-C(8)  | 1.501(3) |
| C(7)-H(7A) | 0.9900   |
| C(7)-H(7B) | 0.9900   |
| C(8)-C(17) | 1.327(3) |
| C(8)-C(9)  | 1.520(3) |

|              |          |
|--------------|----------|
| C(9)-C(11)   | 1.538(2) |
| C(9)-C(10)   | 1.574(2) |
| C(9)-H(9)    | 1.0000   |
| C(10)-C(20)  | 1.536(2) |
| C(11)-C(12)  | 1.537(2) |
| C(11)-H(11A) | 0.9900   |
| C(11)-H(11B) | 0.9900   |
| C(12)-C(13)  | 1.530(2) |
| C(12)-H(12A) | 0.9900   |
| C(12)-H(12B) | 0.9900   |
| C(13)-C(16)  | 1.525(2) |
| C(13)-C(14)  | 1.535(2) |
| C(14)-C(15)  | 1.517(2) |
| C(14)-H(14)  | 1.0000   |
| C(15)-H(15A) | 0.9900   |
| C(15)-H(15B) | 0.9900   |
| C(16)-H(16A) | 0.9800   |
| C(16)-H(16B) | 0.9800   |
| C(16)-H(16C) | 0.9800   |
| C(17)-H(17A) | 0.9500   |
| C(17)-H(17B) | 0.9500   |
| C(19)-H(19A) | 0.9800   |
| C(19)-H(19B) | 0.9800   |
| C(19)-H(19C) | 0.9800   |
| C(20)-H(20A) | 0.9800   |
| C(20)-H(20B) | 0.9800   |
| C(20)-H(20C) | 0.9800   |
| C(21)-C(22)  | 1.497(3) |
| C(22)-H(22A) | 0.9800   |
| C(22)-H(22B) | 0.9800   |
| C(22)-H(22C) | 0.9800   |
| C(23)-C(24)  | 1.495(3) |
| C(24)-H(24A) | 0.9800   |
| C(24)-H(24B) | 0.9800   |
| C(24)-H(24C) | 0.9800   |

C(18)-O(2)-H(2) 109.5

|                  |            |
|------------------|------------|
| C(13)-O(3)-H(3)  | 109.5      |
| C(21)-O(4)-C(15) | 115.52(14) |
| C(23)-O(6)-C(14) | 118.78(13) |
| C(2)-C(1)-C(10)  | 113.56(15) |
| C(2)-C(1)-H(1A)  | 108.9      |
| C(10)-C(1)-H(1A) | 108.9      |
| C(2)-C(1)-H(1B)  | 108.9      |
| C(10)-C(1)-H(1B) | 108.9      |
| H(1A)-C(1)-H(1B) | 107.7      |
| C(3)-C(2)-C(1)   | 111.60(16) |
| C(3)-C(2)-H(2A)  | 109.3      |
| C(1)-C(2)-H(2A)  | 109.3      |
| C(3)-C(2)-H(2B)  | 109.3      |
| C(1)-C(2)-H(2B)  | 109.3      |
| H(2A)-C(2)-H(2B) | 108.0      |
| C(2)-C(3)-C(4)   | 113.42(15) |
| C(2)-C(3)-H(3A)  | 108.9      |
| C(4)-C(3)-H(3A)  | 108.9      |
| C(2)-C(3)-H(3B)  | 108.9      |
| C(4)-C(3)-H(3B)  | 108.9      |
| H(3A)-C(3)-H(3B) | 107.7      |
| C(18)-C(4)-C(3)  | 109.61(15) |
| C(18)-C(4)-C(19) | 105.84(15) |
| C(3)-C(4)-C(19)  | 107.95(15) |
| C(18)-C(4)-C(5)  | 115.25(15) |
| C(3)-C(4)-C(5)   | 108.21(15) |
| C(19)-C(4)-C(5)  | 109.76(15) |
| C(6)-C(5)-C(10)  | 113.25(14) |
| C(6)-C(5)-C(4)   | 114.82(14) |
| C(10)-C(5)-C(4)  | 114.47(14) |
| C(6)-C(5)-H(5)   | 104.2      |
| C(10)-C(5)-H(5)  | 104.2      |
| C(4)-C(5)-H(5)   | 104.2      |
| C(7)-C(6)-C(5)   | 111.19(15) |
| C(7)-C(6)-H(6A)  | 109.4      |
| C(5)-C(6)-H(6A)  | 109.4      |
| C(7)-C(6)-H(6B)  | 109.4      |

|                     |            |
|---------------------|------------|
| C(5)-C(6)-H(6B)     | 109.4      |
| H(6A)-C(6)-H(6B)    | 108.0      |
| C(8)-C(7)-C(6)      | 109.03(15) |
| C(8)-C(7)-H(7A)     | 109.9      |
| C(6)-C(7)-H(7A)     | 109.9      |
| C(8)-C(7)-H(7B)     | 109.9      |
| C(6)-C(7)-H(7B)     | 109.9      |
| H(7A)-C(7)-H(7B)    | 108.3      |
| C(17)-C(8)-C(7)     | 121.67(17) |
| C(17)-C(8)-C(9)     | 125.88(17) |
| C(7)-C(8)-C(9)      | 112.35(16) |
| C(8)-C(9)-C(11)     | 113.37(15) |
| C(8)-C(9)-C(10)     | 109.96(14) |
| C(11)-C(9)-C(10)    | 115.48(14) |
| C(8)-C(9)-H(9)      | 105.7      |
| C(11)-C(9)-H(9)     | 105.7      |
| C(10)-C(9)-H(9)     | 105.7      |
| C(20)-C(10)-C(1)    | 109.59(14) |
| C(20)-C(10)-C(5)    | 113.12(14) |
| C(1)-C(10)-C(5)     | 108.62(14) |
| C(20)-C(10)-C(9)    | 109.60(15) |
| C(1)-C(10)-C(9)     | 108.99(14) |
| C(5)-C(10)-C(9)     | 106.81(14) |
| C(12)-C(11)-C(9)    | 108.62(14) |
| C(12)-C(11)-H(11A)  | 110.0      |
| C(9)-C(11)-H(11A)   | 110.0      |
| C(12)-C(11)-H(11B)  | 110.0      |
| C(9)-C(11)-H(11B)   | 110.0      |
| H(11A)-C(11)-H(11B) | 108.3      |
| C(13)-C(12)-C(11)   | 118.61(14) |
| C(13)-C(12)-H(12A)  | 107.7      |
| C(11)-C(12)-H(12A)  | 107.7      |
| C(13)-C(12)-H(12B)  | 107.7      |
| C(11)-C(12)-H(12B)  | 107.7      |
| H(12A)-C(12)-H(12B) | 107.1      |
| O(3)-C(13)-C(16)    | 108.74(14) |
| O(3)-C(13)-C(12)    | 107.81(13) |



|                     |            |
|---------------------|------------|
| C(16)-C(13)-C(12)   | 111.84(15) |
| O(3)-C(13)-C(14)    | 105.63(13) |
| C(16)-C(13)-C(14)   | 109.48(14) |
| C(12)-C(13)-C(14)   | 113.05(14) |
| O(6)-C(14)-C(15)    | 106.86(13) |
| O(6)-C(14)-C(13)    | 105.57(13) |
| C(15)-C(14)-C(13)   | 114.25(14) |
| O(6)-C(14)-H(14)    | 110.0      |
| C(15)-C(14)-H(14)   | 110.0      |
| C(13)-C(14)-H(14)   | 110.0      |
| O(4)-C(15)-C(14)    | 109.48(14) |
| O(4)-C(15)-H(15A)   | 109.8      |
| C(14)-C(15)-H(15A)  | 109.8      |
| O(4)-C(15)-H(15B)   | 109.8      |
| C(14)-C(15)-H(15B)  | 109.8      |
| H(15A)-C(15)-H(15B) | 108.2      |
| C(13)-C(16)-H(16A)  | 109.5      |
| C(13)-C(16)-H(16B)  | 109.5      |
| H(16A)-C(16)-H(16B) | 109.5      |
| C(13)-C(16)-H(16C)  | 109.5      |
| H(16A)-C(16)-H(16C) | 109.5      |
| H(16B)-C(16)-H(16C) | 109.5      |
| C(8)-C(17)-H(17A)   | 120.0      |
| C(8)-C(17)-H(17B)   | 120.0      |
| H(17A)-C(17)-H(17B) | 120.0      |
| O(1)-C(18)-O(2)     | 122.38(18) |
| O(1)-C(18)-C(4)     | 123.99(18) |
| O(2)-C(18)-C(4)     | 113.53(16) |
| C(4)-C(19)-H(19A)   | 109.5      |
| C(4)-C(19)-H(19B)   | 109.5      |
| H(19A)-C(19)-H(19B) | 109.5      |
| C(4)-C(19)-H(19C)   | 109.5      |
| H(19A)-C(19)-H(19C) | 109.5      |
| H(19B)-C(19)-H(19C) | 109.5      |
| C(10)-C(20)-H(20A)  | 109.5      |
| C(10)-C(20)-H(20B)  | 109.5      |
| H(20A)-C(20)-H(20B) | 109.5      |

|                     |            |
|---------------------|------------|
| C(10)-C(20)-H(20C)  | 109.5      |
| H(20A)-C(20)-H(20C) | 109.5      |
| H(20B)-C(20)-H(20C) | 109.5      |
| O(5)-C(21)-O(4)     | 123.72(17) |
| O(5)-C(21)-C(22)    | 125.65(18) |
| O(4)-C(21)-C(22)    | 110.62(17) |
| C(21)-C(22)-H(22A)  | 109.5      |
| C(21)-C(22)-H(22B)  | 109.5      |
| H(22A)-C(22)-H(22B) | 109.5      |
| C(21)-C(22)-H(22C)  | 109.5      |
| H(22A)-C(22)-H(22C) | 109.5      |
| H(22B)-C(22)-H(22C) | 109.5      |
| O(7)-C(23)-O(6)     | 123.76(17) |
| O(7)-C(23)-C(24)    | 124.19(17) |
| O(6)-C(23)-C(24)    | 112.05(16) |
| C(23)-C(24)-H(24A)  | 109.5      |
| C(23)-C(24)-H(24B)  | 109.5      |
| H(24A)-C(24)-H(24B) | 109.5      |
| C(23)-C(24)-H(24C)  | 109.5      |
| H(24A)-C(24)-H(24C) | 109.5      |
| H(24B)-C(24)-H(24C) | 109.5      |

---

Symmetry transformations used to generate equivalent atoms:

**Table S4.** Anisotropic displacement parameters ( $\text{\AA}^2 \times 10^3$ ) for compound **9**. The anisotropic displacement factor exponent takes the form:  $-2\pi^2 [ h^2 a^{*2} U^{11} + \dots + 2 h k a^* b^* U^{12} ]$

|       | U <sup>11</sup> | U <sup>22</sup> | U <sup>33</sup> | U <sup>23</sup> | U <sup>13</sup> | U <sup>12</sup> |
|-------|-----------------|-----------------|-----------------|-----------------|-----------------|-----------------|
| O(1)  | 37(1)           | 24(1)           | 35(1)           | -10(1)          | 5(1)            | -2(1)           |
| O(2)  | 36(1)           | 18(1)           | 26(1)           | -4(1)           | 2(1)            | -9(1)           |
| O(3)  | 32(1)           | 17(1)           | 14(1)           | 0(1)            | 0(1)            | 4(1)            |
| O(4)  | 22(1)           | 22(1)           | 21(1)           | 2(1)            | 3(1)            | -2(1)           |
| O(5)  | 37(1)           | 24(1)           | 35(1)           | -2(1)           | 11(1)           | -1(1)           |
| O(6)  | 25(1)           | 16(1)           | 15(1)           | 0(1)            | 0(1)            | 2(1)            |
| O(7)  | 51(1)           | 22(1)           | 16(1)           | 0(1)            | -3(1)           | 4(1)            |
| C(1)  | 24(1)           | 20(1)           | 23(1)           | 1(1)            | 2(1)            | -1(1)           |
| C(2)  | 24(1)           | 24(1)           | 30(1)           | -2(1)           | 7(1)            | 1(1)            |
| C(3)  | 23(1)           | 21(1)           | 35(1)           | -4(1)           | 0(1)            | 2(1)            |
| C(4)  | 26(1)           | 16(1)           | 24(1)           | 1(1)            | -4(1)           | 1(1)            |
| C(5)  | 24(1)           | 14(1)           | 20(1)           | -1(1)           | -3(1)           | -2(1)           |
| C(6)  | 32(1)           | 17(1)           | 18(1)           | 2(1)            | 1(1)            | -1(1)           |
| C(7)  | 36(1)           | 19(1)           | 18(1)           | 0(1)            | 5(1)            | 0(1)            |
| C(8)  | 28(1)           | 14(1)           | 20(1)           | -2(1)           | 3(1)            | -2(1)           |
| C(9)  | 21(1)           | 16(1)           | 17(1)           | 0(1)            | 1(1)            | -1(1)           |
| C(10) | 21(1)           | 16(1)           | 18(1)           | 0(1)            | 0(1)            | -1(1)           |
| C(11) | 24(1)           | 17(1)           | 16(1)           | 1(1)            | 0(1)            | 1(1)            |
| C(12) | 22(1)           | 18(1)           | 16(1)           | 0(1)            | 0(1)            | 0(1)            |
| C(13) | 21(1)           | 16(1)           | 17(1)           | -1(1)           | 1(1)            | 2(1)            |
| C(14) | 22(1)           | 14(1)           | 15(1)           | 1(1)            | -1(1)           | 2(1)            |
| C(15) | 22(1)           | 20(1)           | 18(1)           | 2(1)            | 2(1)            | -1(1)           |
| C(16) | 23(1)           | 24(1)           | 21(1)           | 3(1)            | 2(1)            | 2(1)            |
| C(17) | 28(1)           | 23(1)           | 29(1)           | 2(1)            | 6(1)            | -1(1)           |
| C(18) | 30(1)           | 14(1)           | 23(1)           | 3(1)            | -3(1)           | 2(1)            |
| C(19) | 36(1)           | 20(1)           | 31(1)           | 0(1)            | -9(1)           | 5(1)            |
| C(20) | 23(1)           | 18(1)           | 19(1)           | -1(1)           | 0(1)            | -1(1)           |
| C(21) | 18(1)           | 28(1)           | 24(1)           | -1(1)           | 2(1)            | 2(1)            |
| C(22) | 30(1)           | 41(1)           | 26(1)           | 0(1)            | 6(1)            | -1(1)           |
| C(23) | 23(1)           | 21(1)           | 17(1)           | 0(1)            | 1(1)            | -1(1)           |
| C(24) | 46(1)           | 22(1)           | 21(1)           | 3(1)            | -3(1)           | 5(1)            |
